# Supplementary material for: Gold catalysed transformation of 2-arylindoles to terphenyl amines via 3-dienyl indoles and Brønsted acid promoted formation of 2-carboxyindoles to 3-indenylindoles via 3-allenylindoles
Source: Royal Society of Chemistry journal article supplement (doi:10.1039/c9ob00232d), 2019-01-01
Supplement: c9ob00232d1.pdf [file c9ob00232d1.pdf]

## Electronic Supplementary Information

**Gold catalysed transformation of 2-arylindoles to terphenyl amines *via* 3-dienyl indoles and Brønsted acid promoted formation of 2-carboxyindoles to 3-indenylindoles *via* 3-allenylindoles**

*U. Anasuyamma\* and K. C. Kumara Swamy\**

School of Chemistry, University of Hyderabad

Hyderabad 500 046, Telangana, India.

e-mail: anusvu@gmail.com for AU and kckssc@uohyd.ac.in, kckssc@yahoo.com. for KCKS

|    |                                                                                  |                |
|----|----------------------------------------------------------------------------------|----------------|
| 1  | ORTEPs of <b>9</b> , <b>21</b> , <b>25</b> and <b>27</b> (Figures <b>S1-S3</b> ) | <b>S2</b>      |
| 12 | Copies of <sup>1</sup> H/ <sup>13</sup> C NMR spectra (Figures <b>S4-S55</b> )   | <b>S3-S28</b>  |
| 3  | Chiral HPLC data for <b>25</b> and <b>27</b> (Figures <b>S56-S57</b> )           | <b>S29-S30</b> |

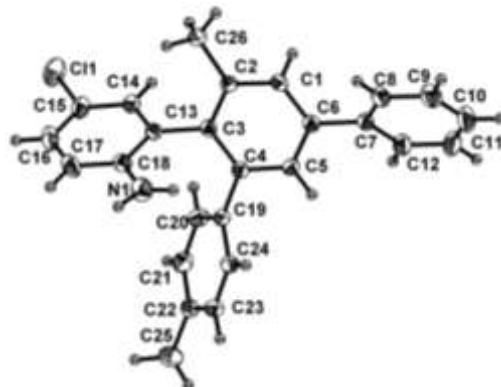

**Figure S1.** ORTEP of compound **9** (probability level 30%; CCDC 1894264).

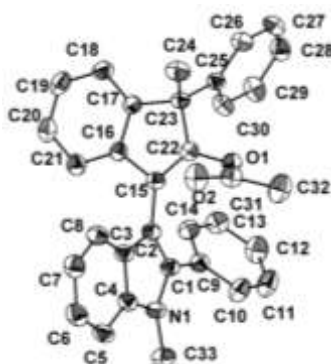

**Figure S2.** ORTEP of compound **21** (probability level 30%; CCDC 1894265).

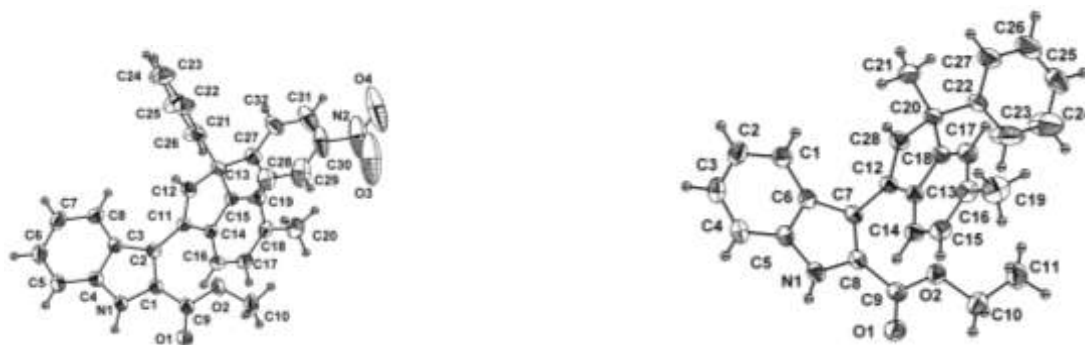

**Figure S3.** ORTEPs of compounds **25** (left; probability level 30%; CCDC 1894266) and **27** (right, probability level 30%; CCDC 1894267).

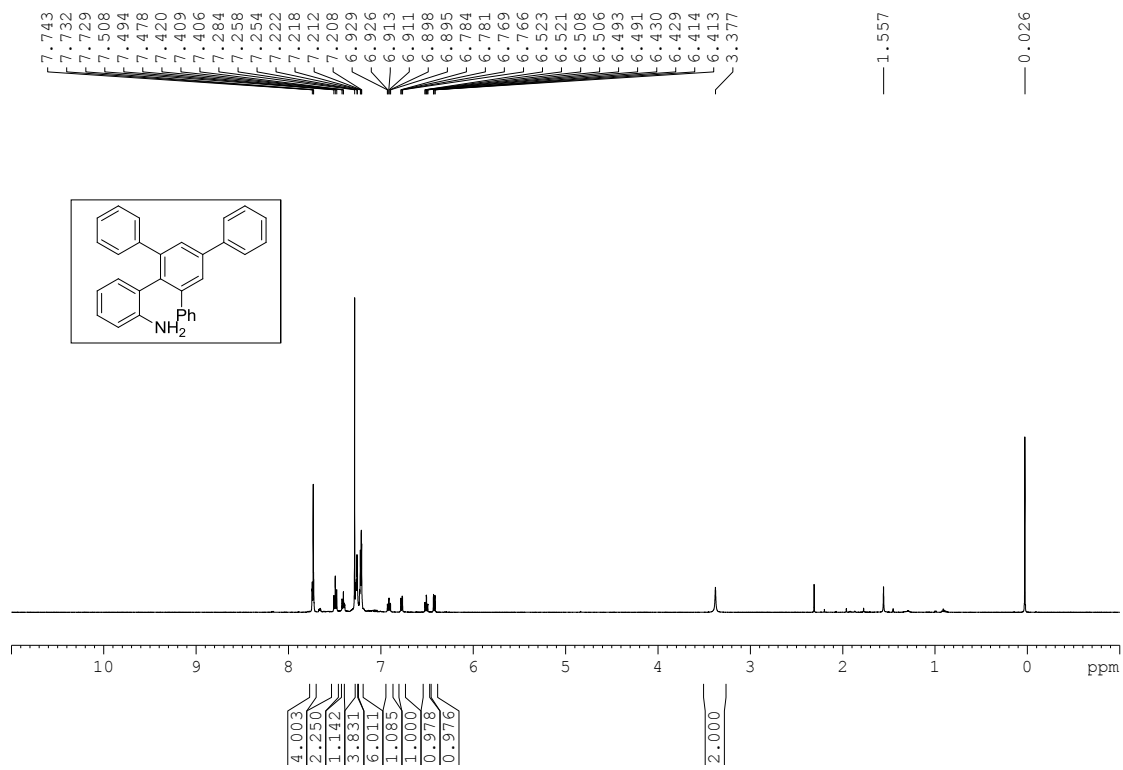

Figure S4.  $^1\text{H}$  NMR spectrum of compound 4

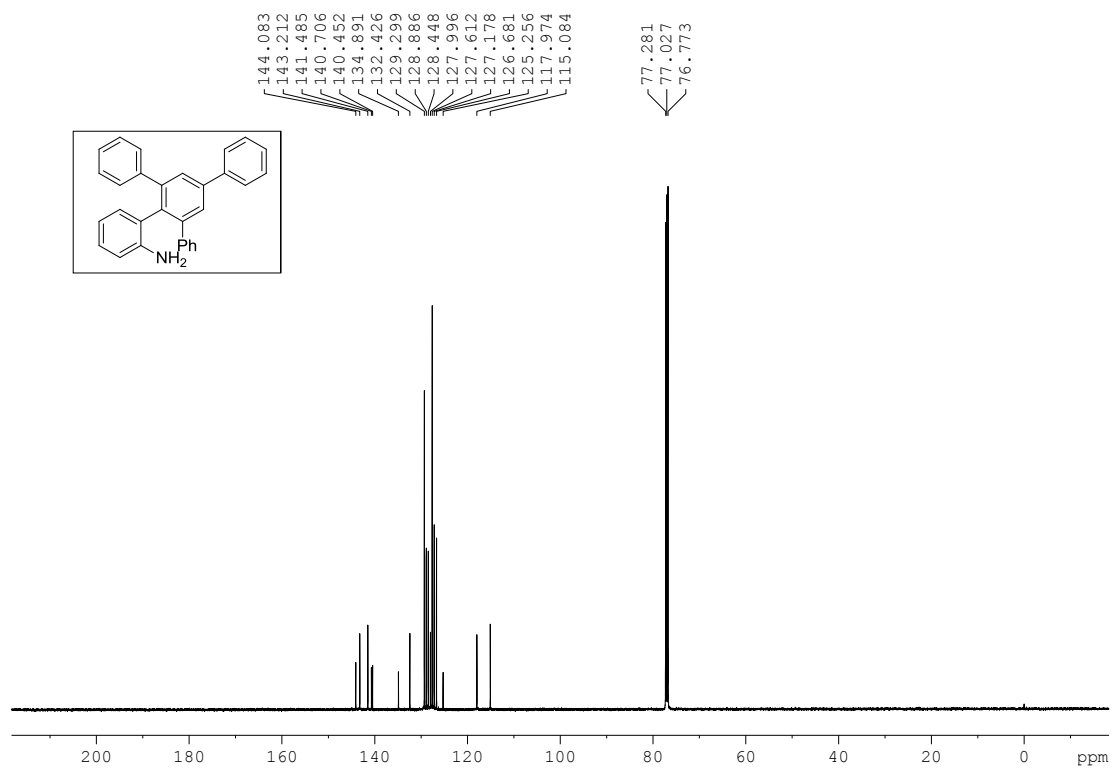

Figure S5.  $^{13}\text{C}$  NMR spectrum of compound 4

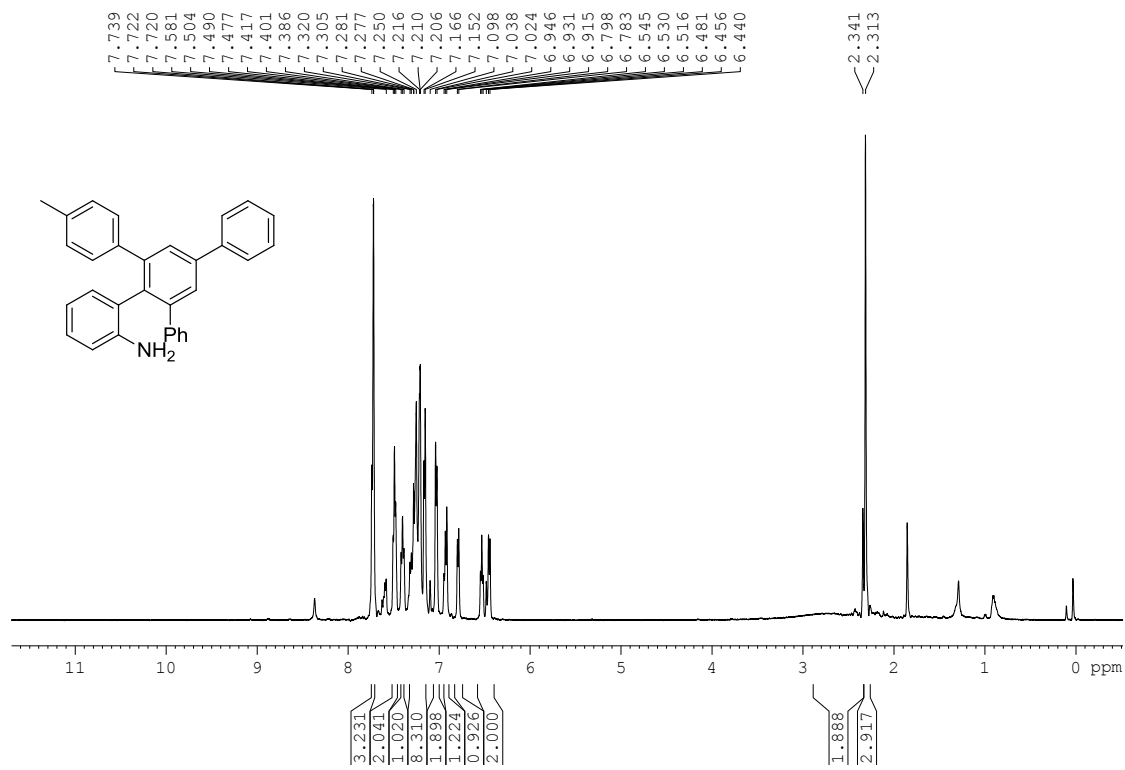

Figure S6. <sup>1</sup>H NMR spectrum of compound 5

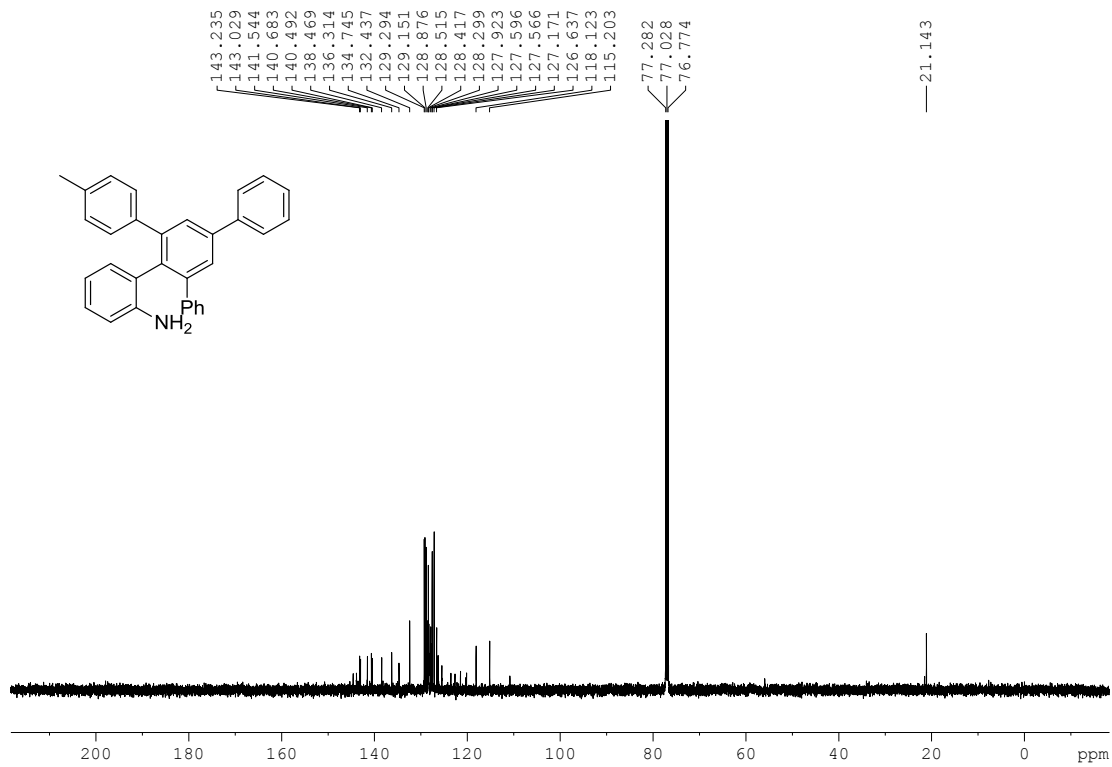

Figure S7. <sup>13</sup>C NMR spectrum of compound 5

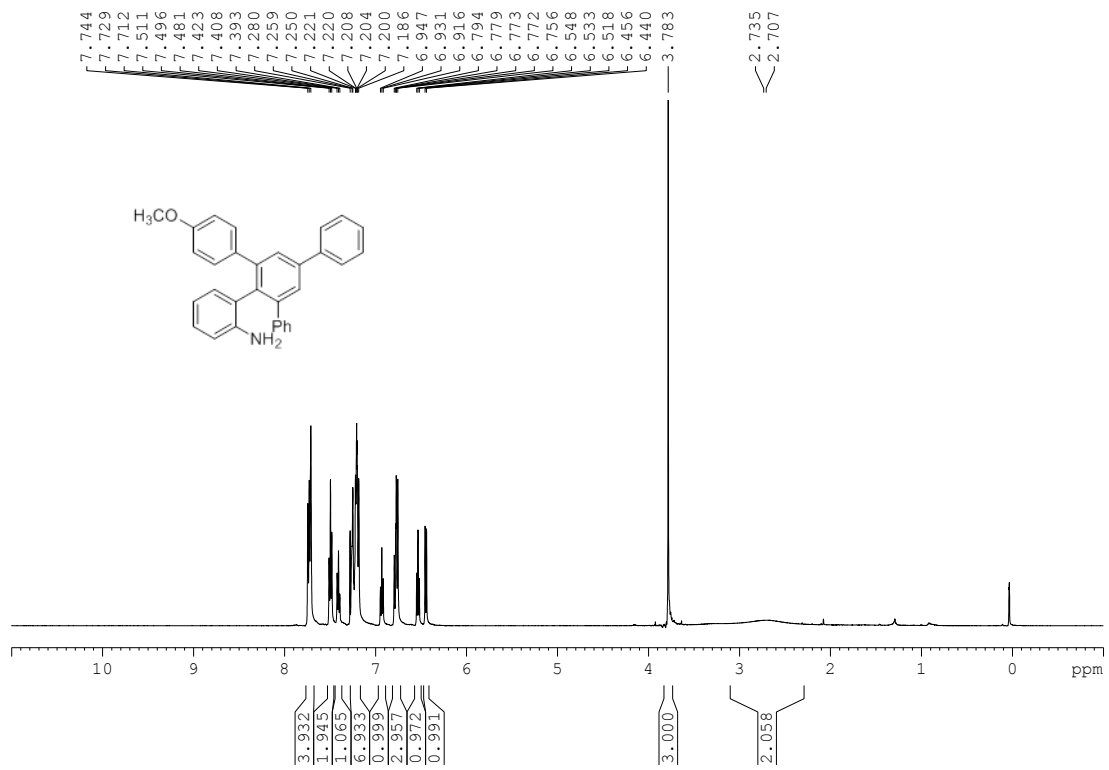

Figure S8. <sup>1</sup>H NMR spectrum of compound 6

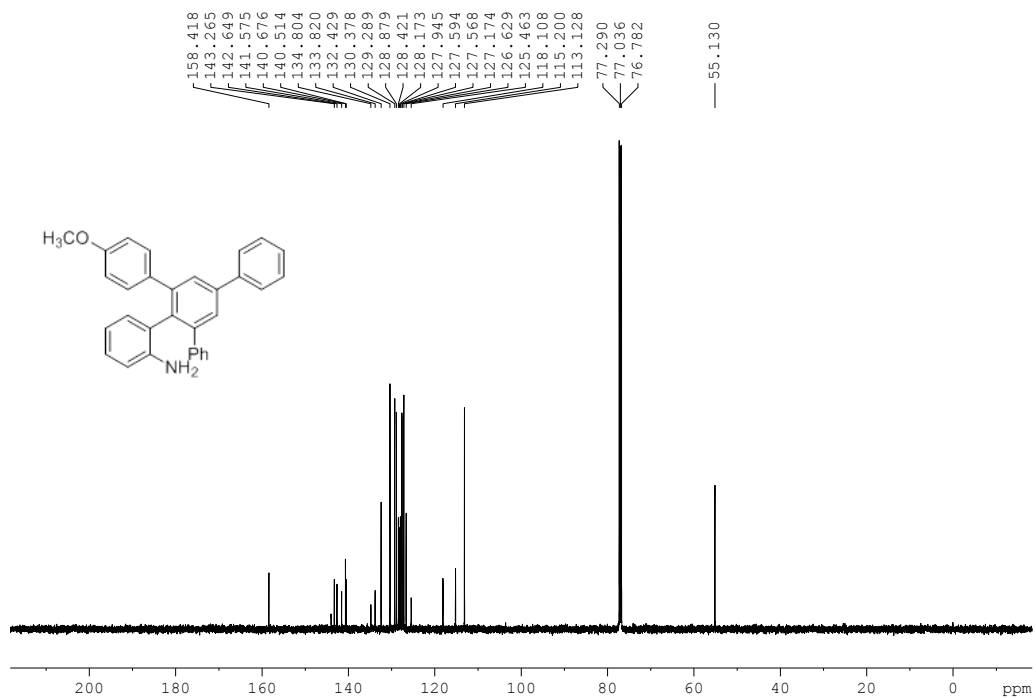

Figure S9. <sup>13</sup>C NMR spectrum of compound 6

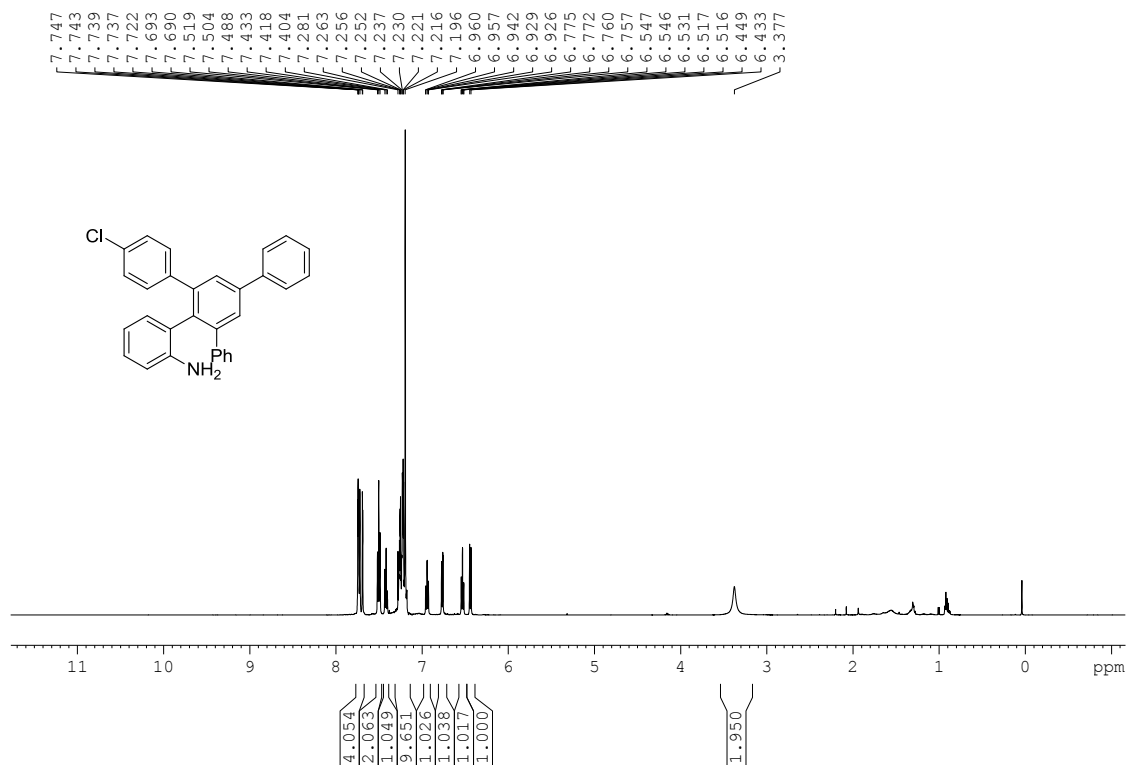

Figure S10. <sup>1</sup>H NMR spectrum of compound 7

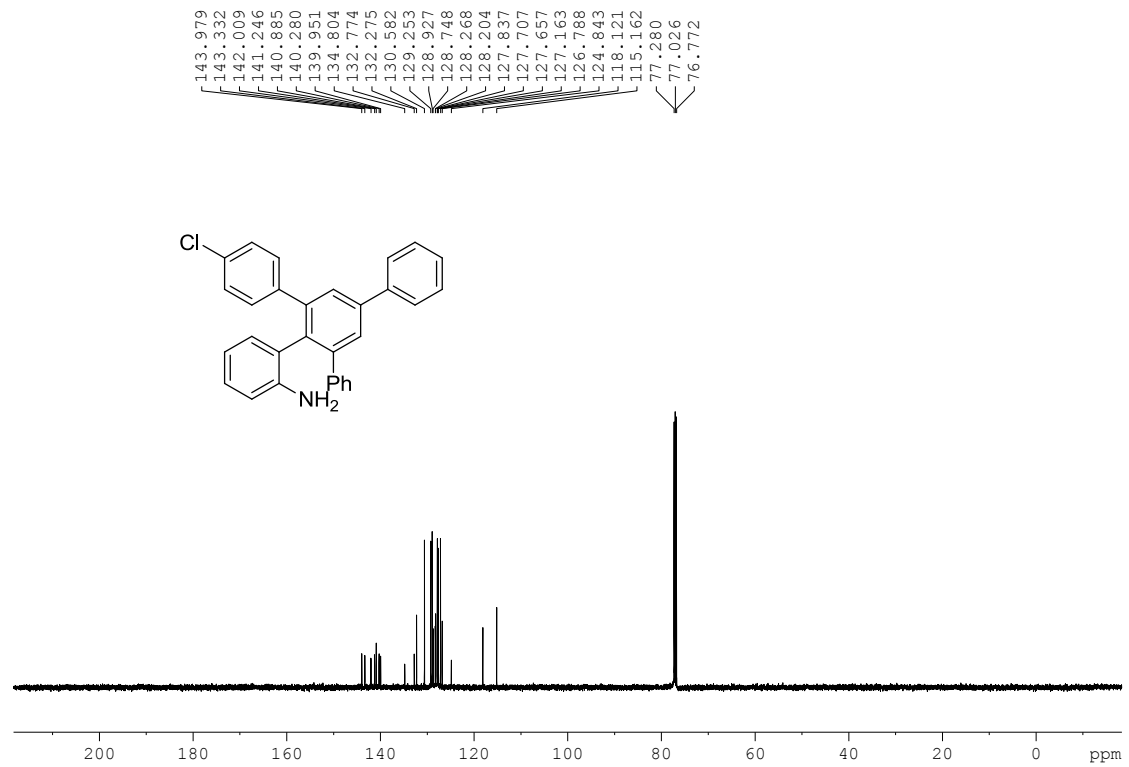

Figure S11. <sup>13</sup>C NMR spectrum of compound 7

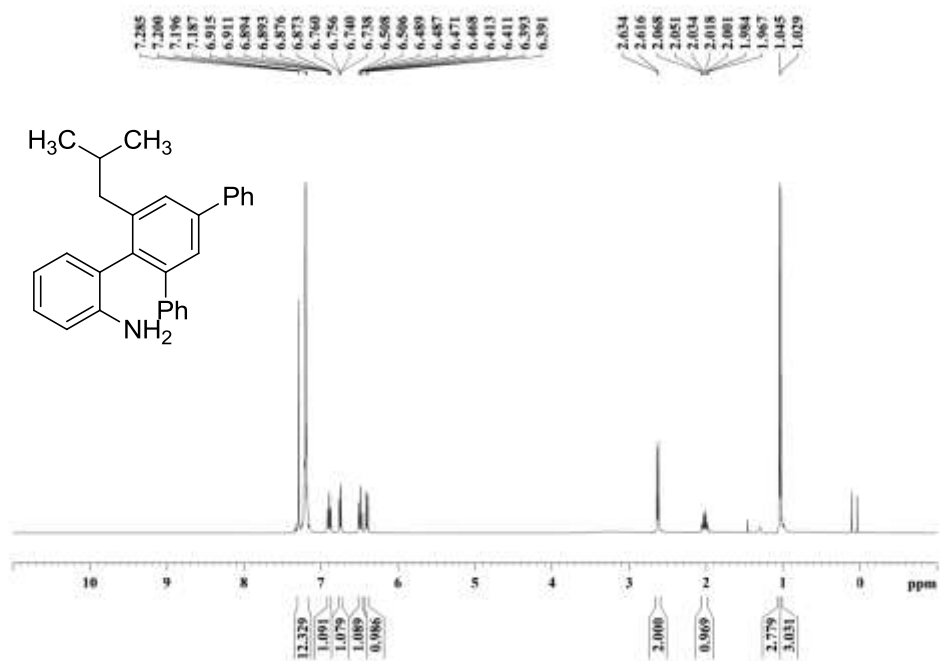

Figure S12. <sup>1</sup>H NMR spectrum of compound 8

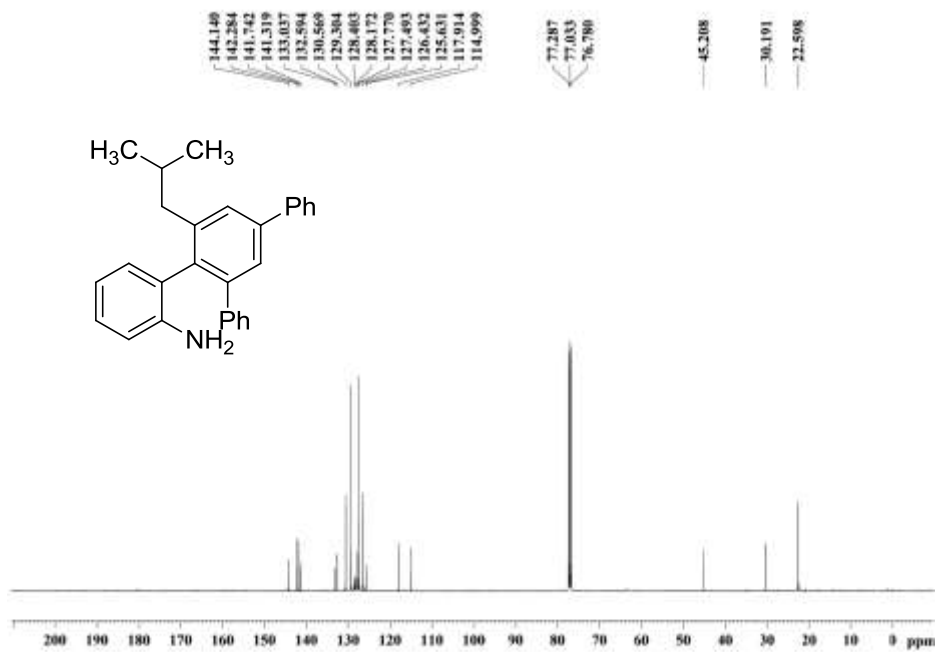

Figure S13. <sup>13</sup>C NMR spectrum of compound 8

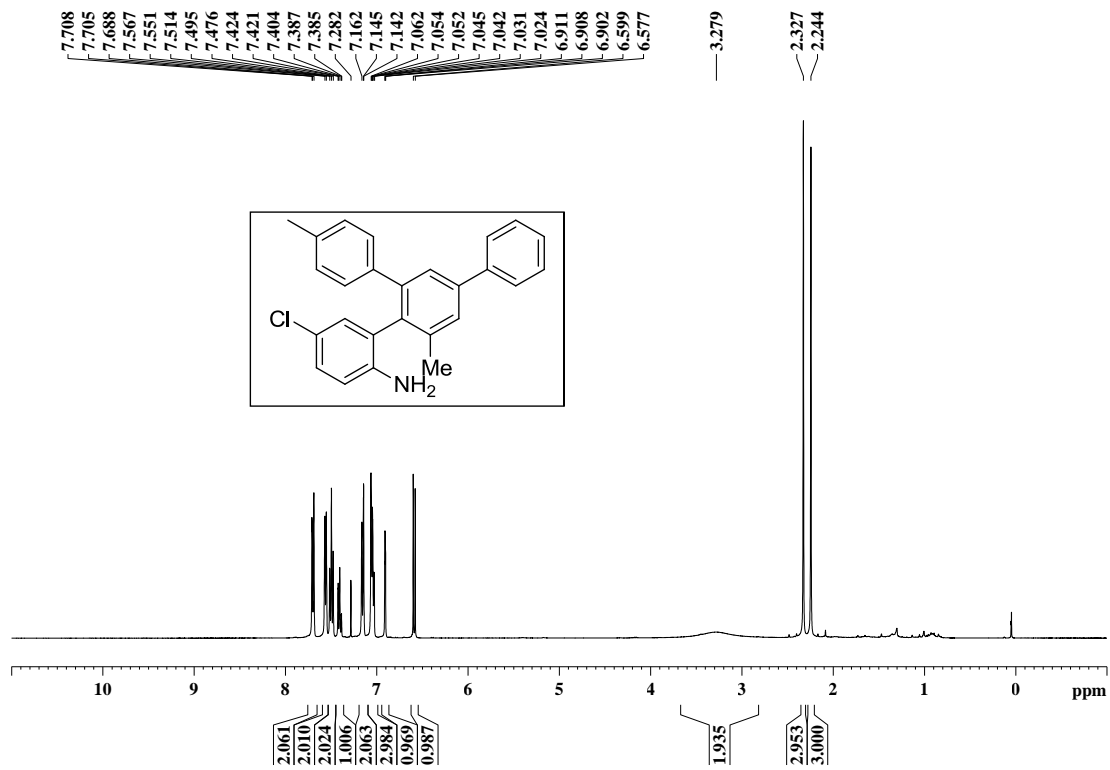

Figure S14.  $^1\text{H}$  NMR spectrum of compound 9

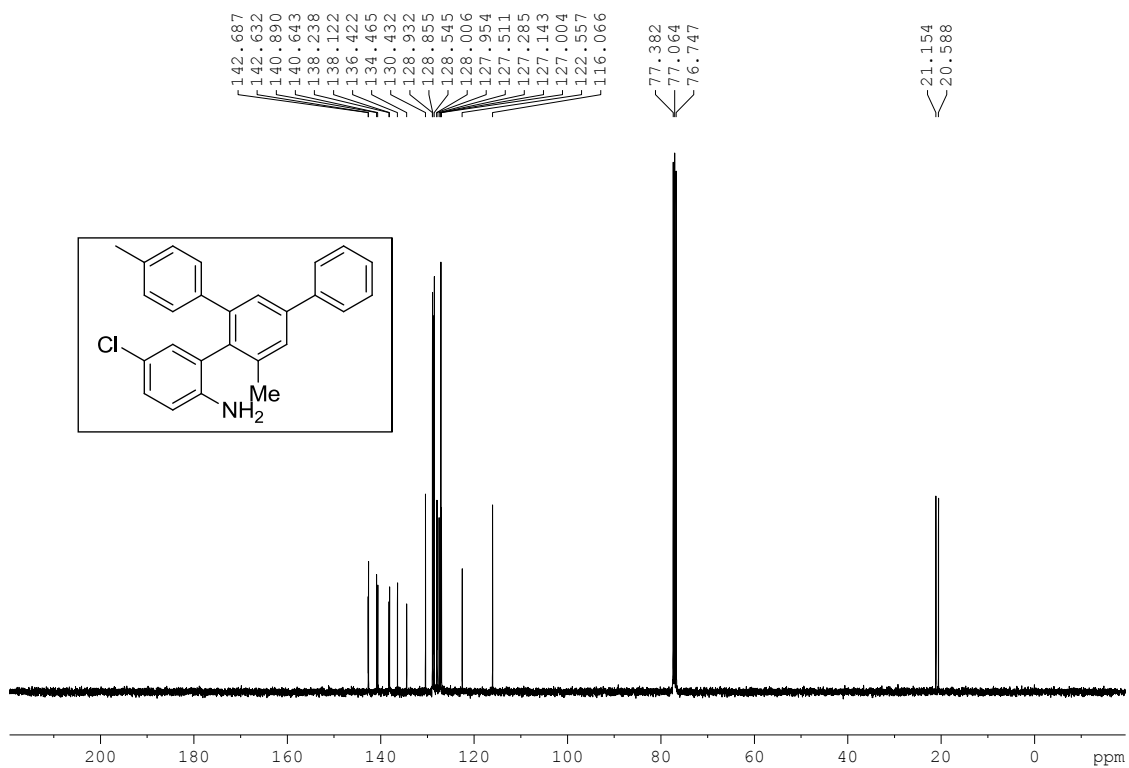

Figure S15.  $^{13}\text{C}$  NMR spectrum of compound 9



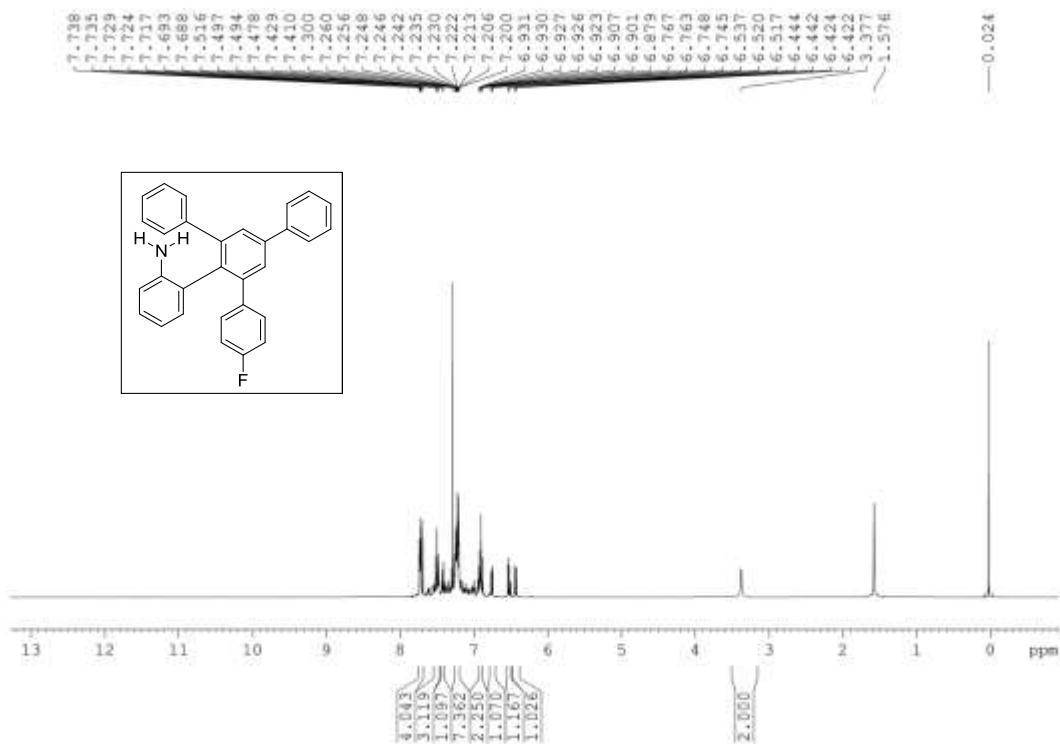

Figure S16.  $^1\text{H}$  NMR spectrum of compound 10

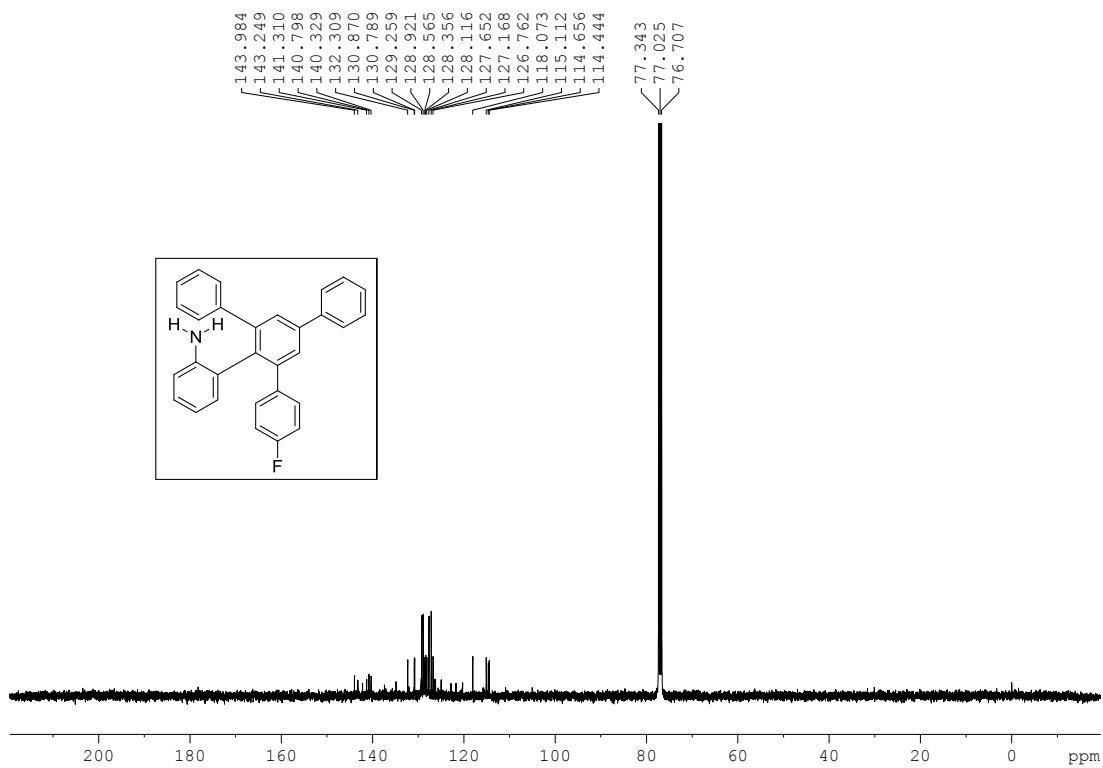

Figure S17.  $^{13}\text{C}$  NMR spectrum of compound 10

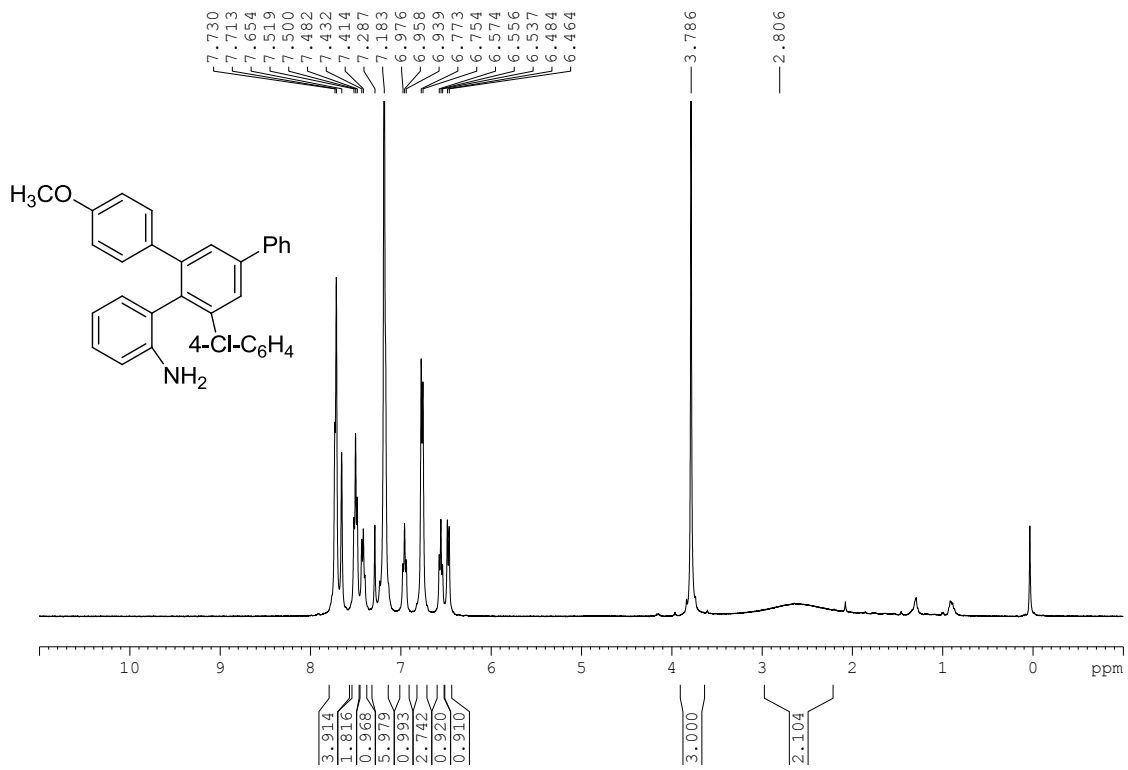

Figure S18. <sup>1</sup>H NMR spectrum of compound 11

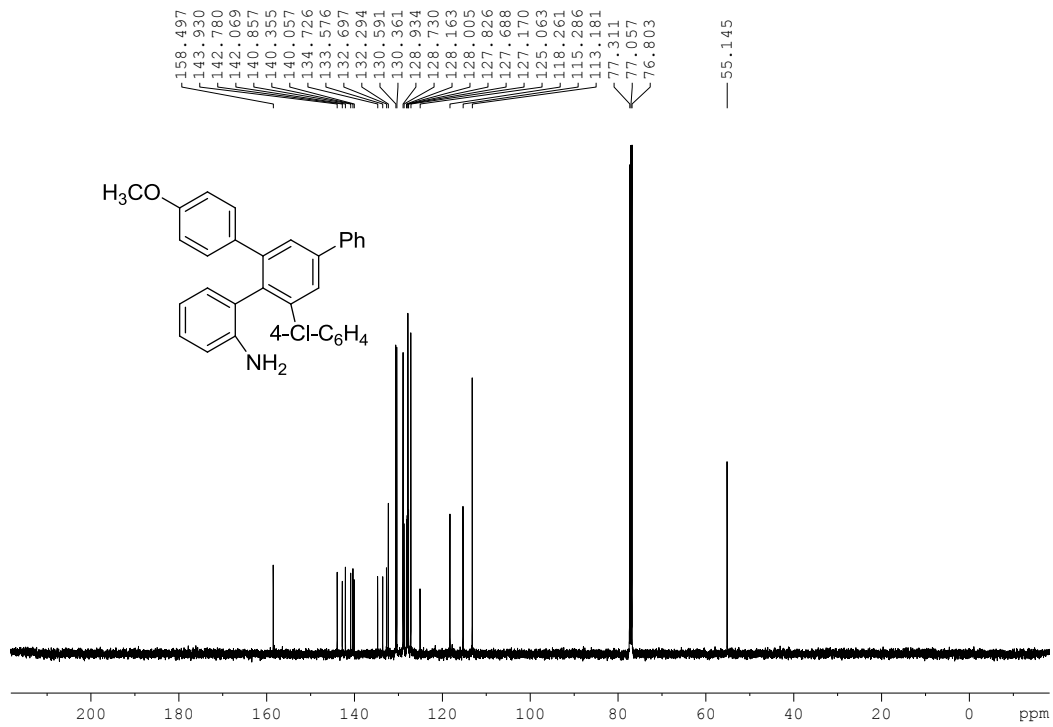

Figure S19. <sup>13</sup>C NMR spectrum of compound 11

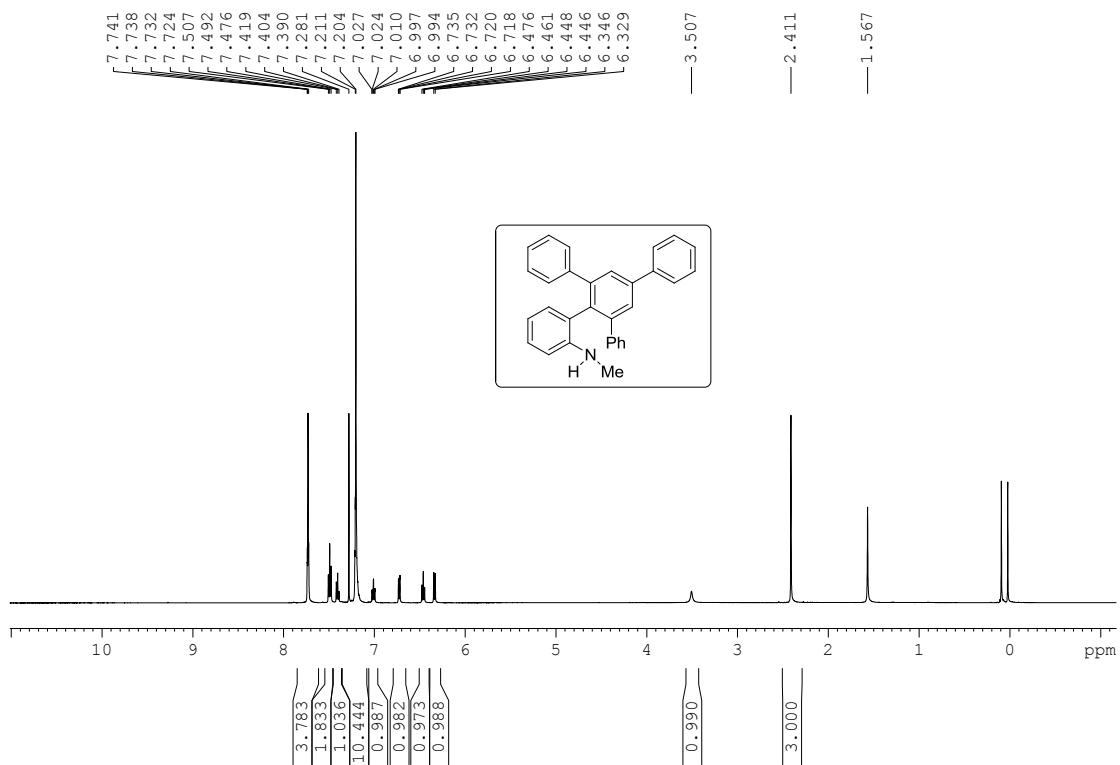

Figure S20. <sup>1</sup>H NMR spectrum of compound 12

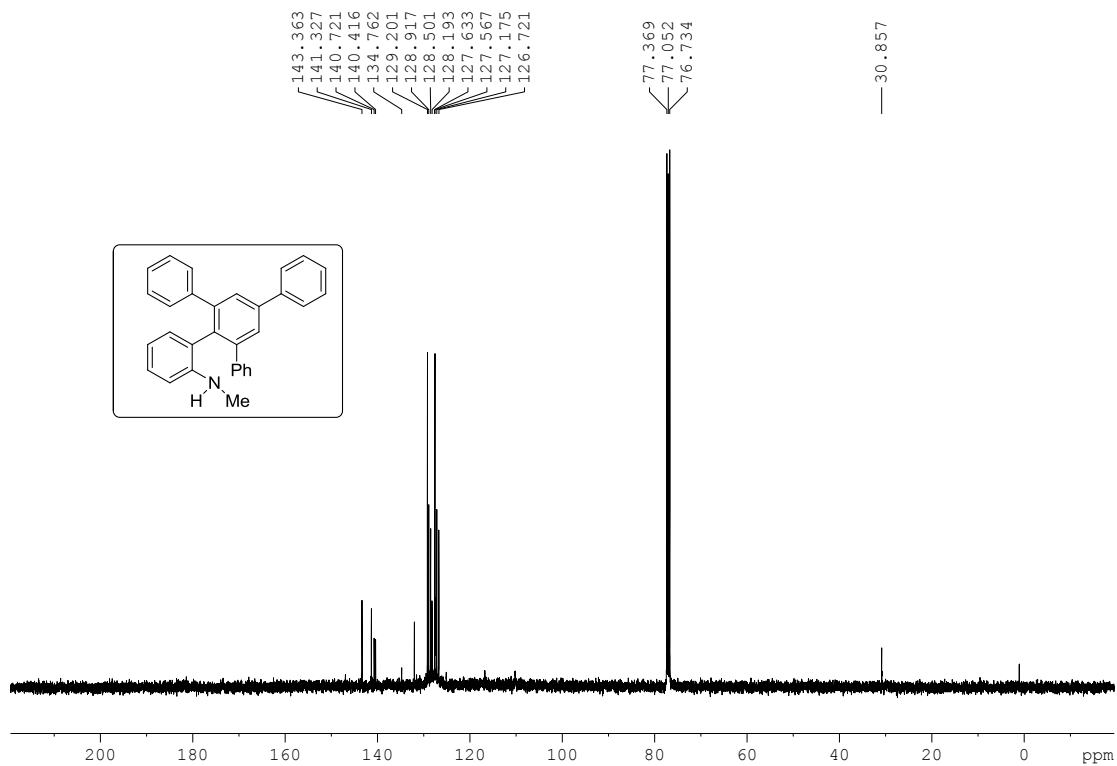

Figure S21. <sup>13</sup>C NMR spectrum of compound 12

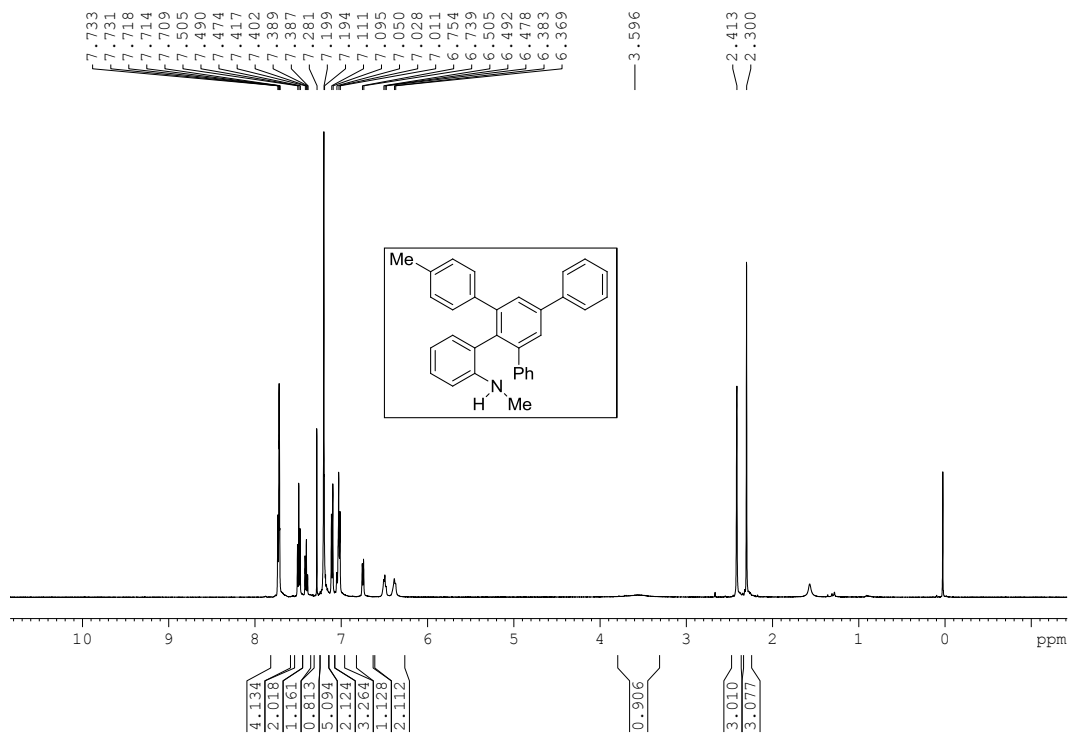

Figure S22. <sup>1</sup>H NMR spectrum of compound 13

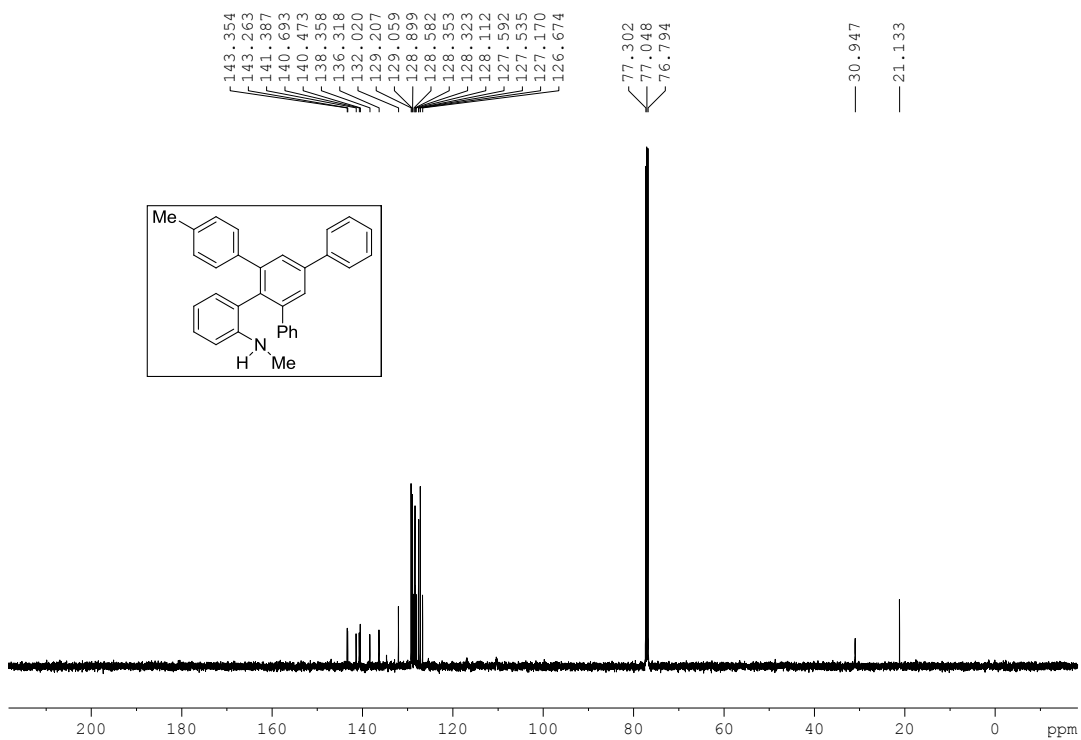

Figure S23. <sup>13</sup>C NMR spectrum of compound 13

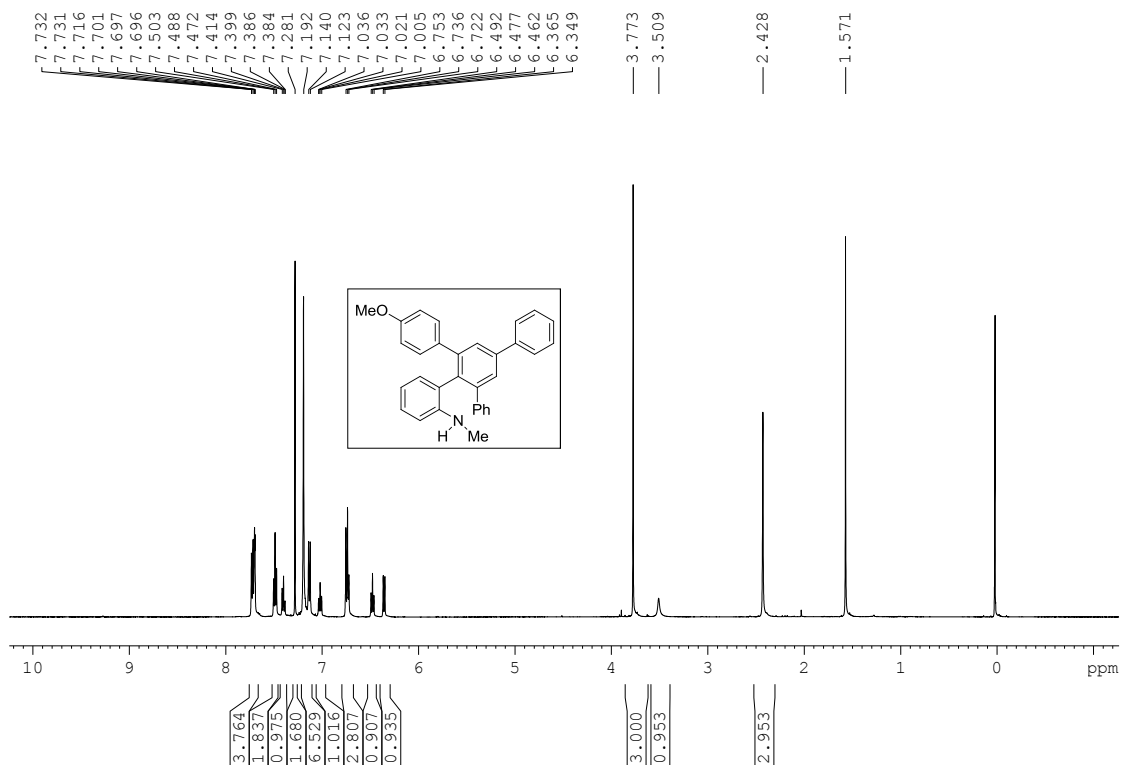

Figure S24. <sup>1</sup>H NMR spectrum of compound 14

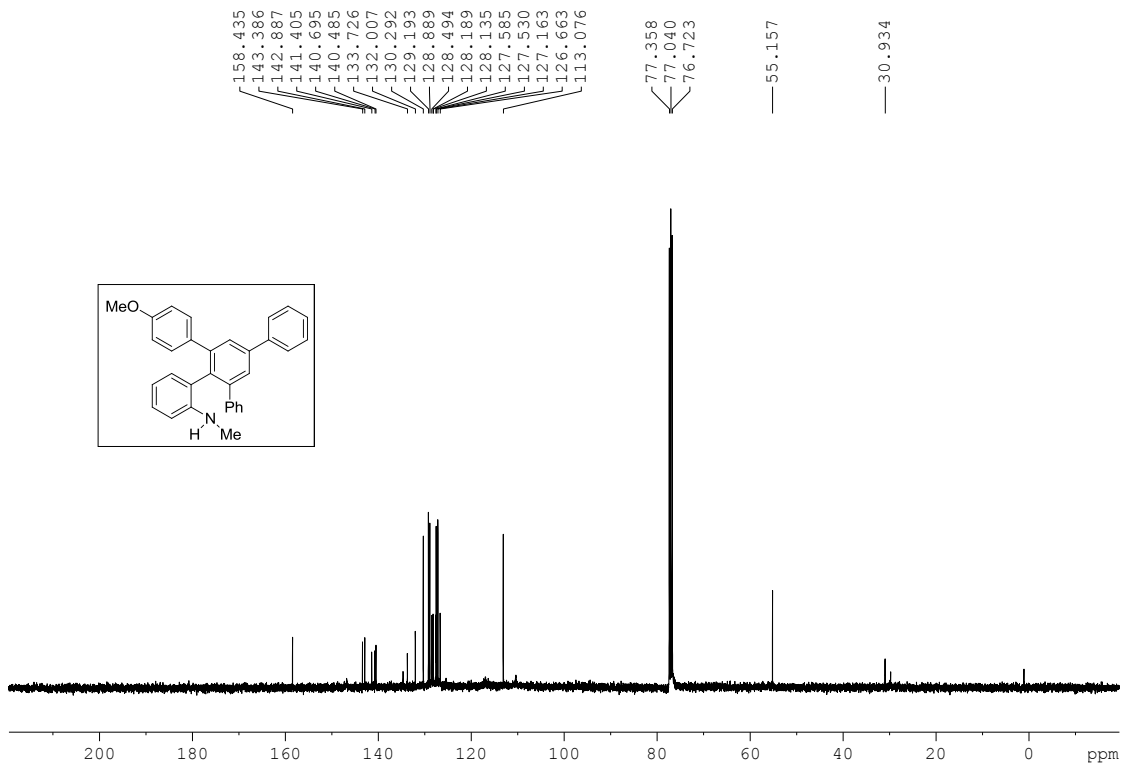

Figure S25. <sup>13</sup>C NMR spectrum of compound 14

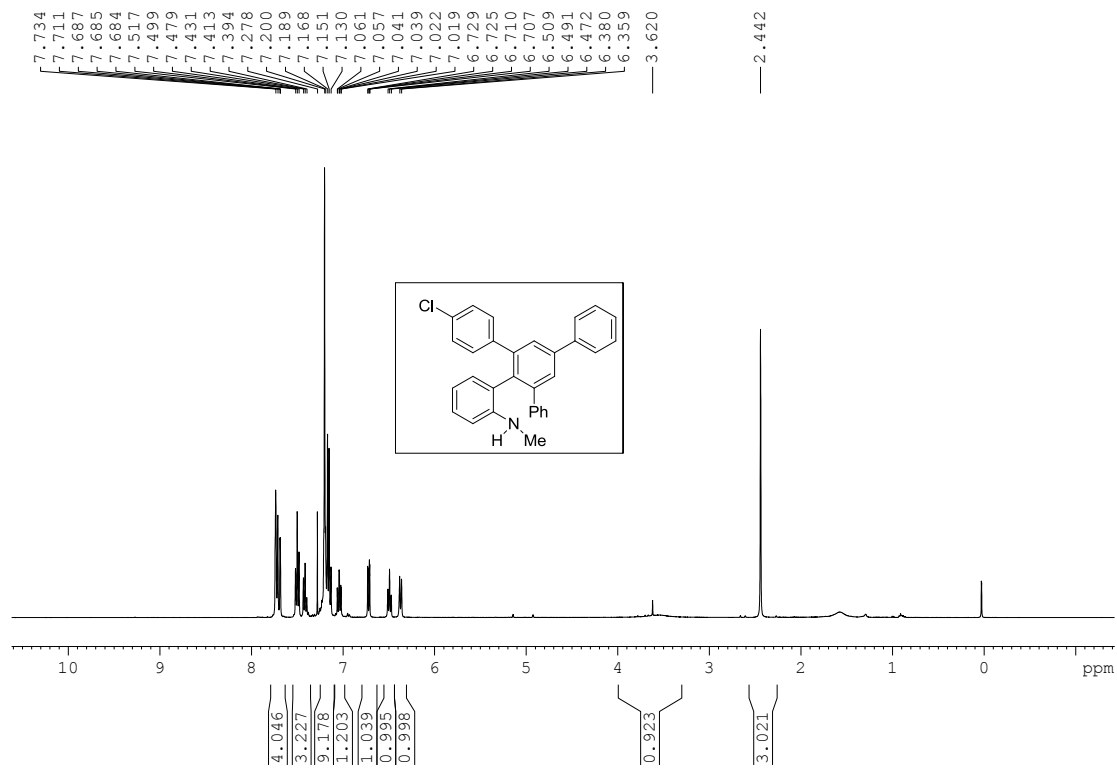

Figure S26. <sup>1</sup>H NMR spectrum of compound 15

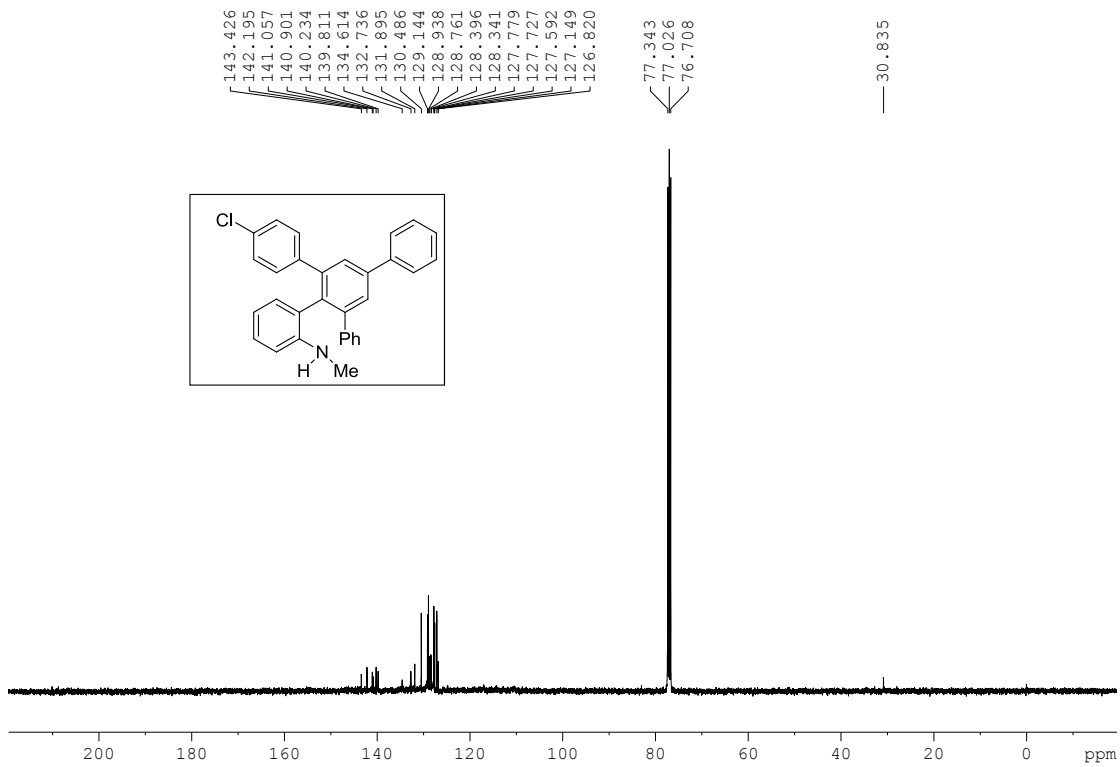

Figure S27. <sup>13</sup>C NMR spectrum of compound 15

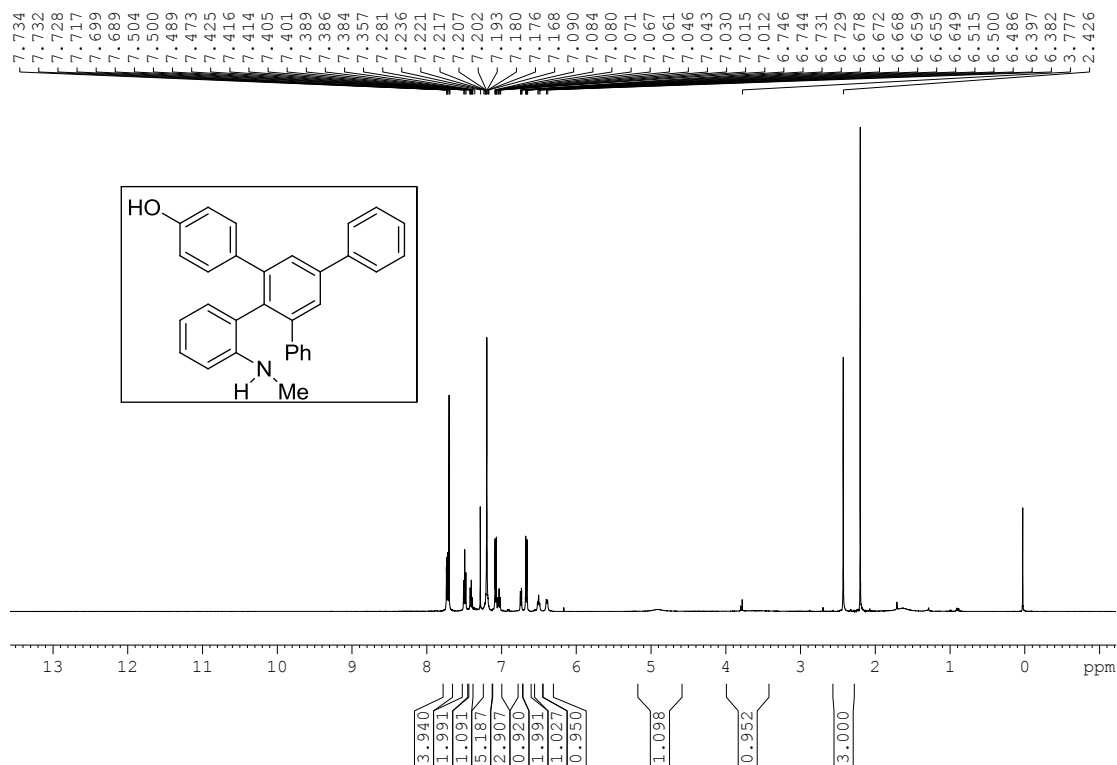

Figure S28. <sup>1</sup>H NMR spectrum of compound 16

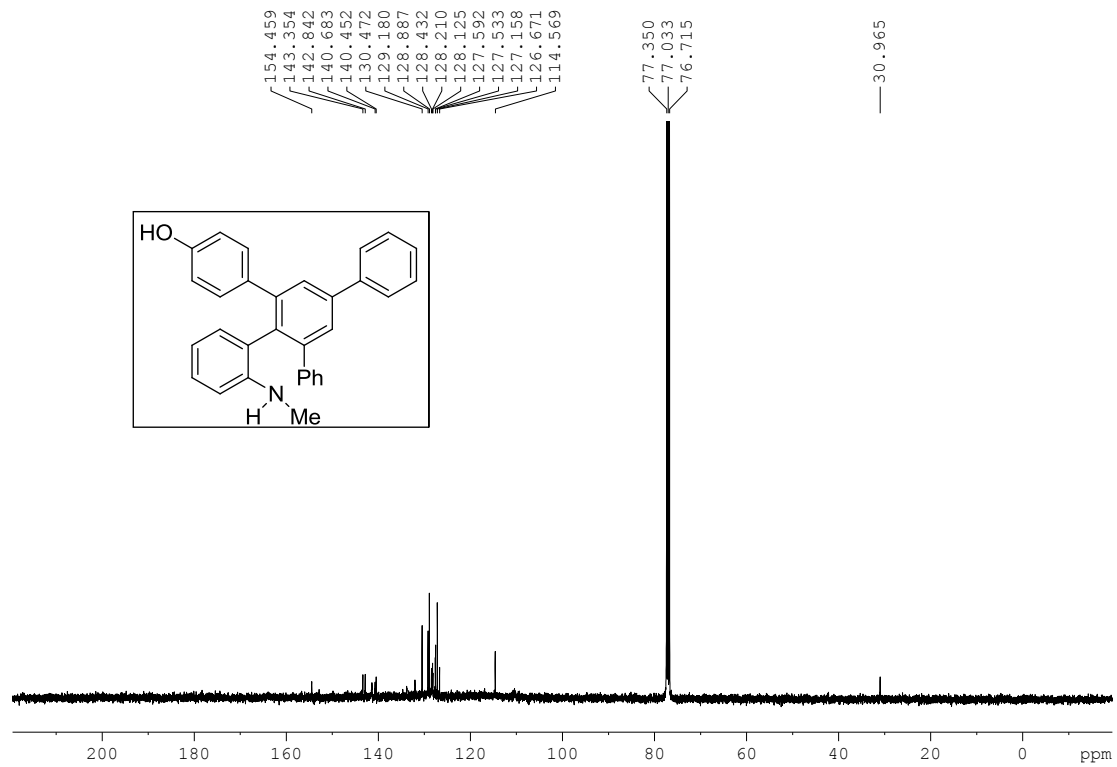

Figure S29. <sup>13</sup>C NMR spectrum of compound 16

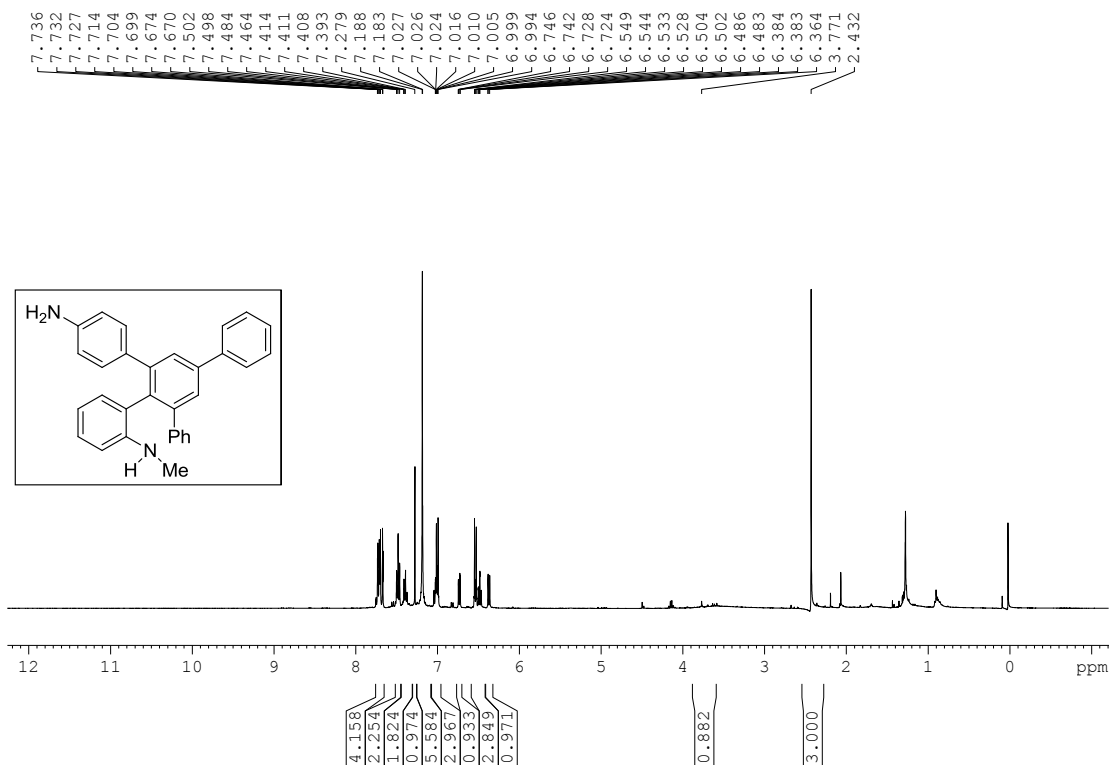

Figure S30. <sup>1</sup>H NMR spectrum of compound 17

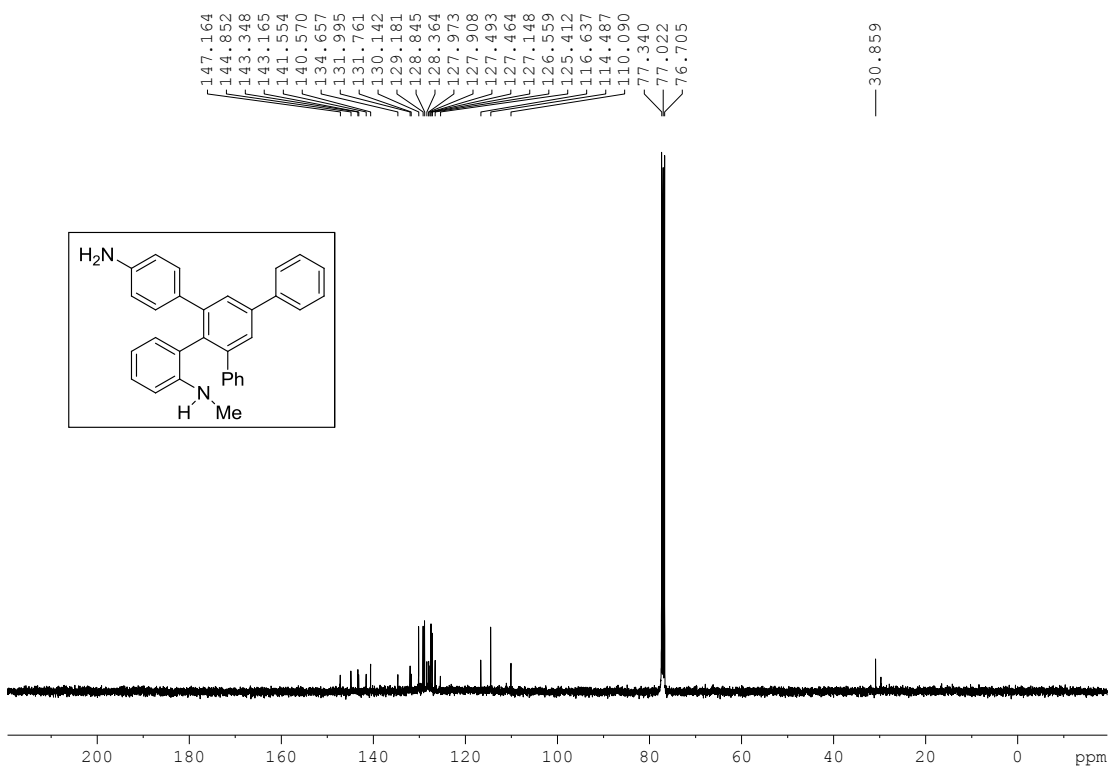

Figure S31. <sup>13</sup>C NMR spectrum of compound 17



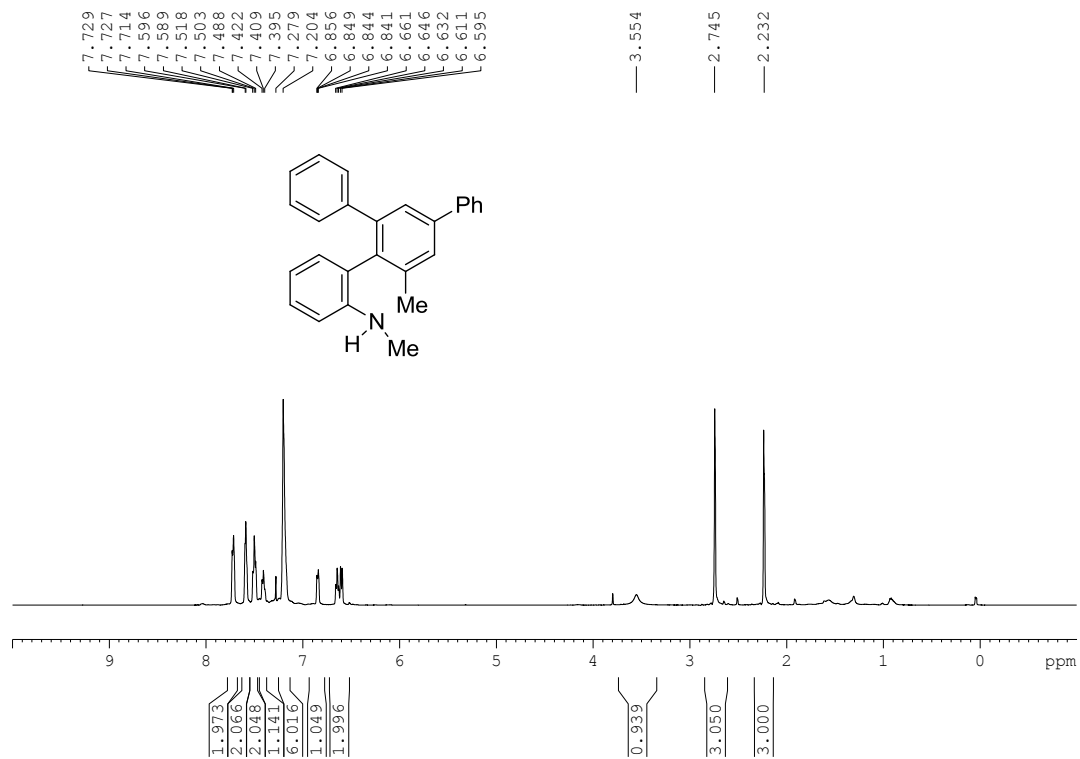

Figure S32. <sup>1</sup>H NMR spectrum of compound 18

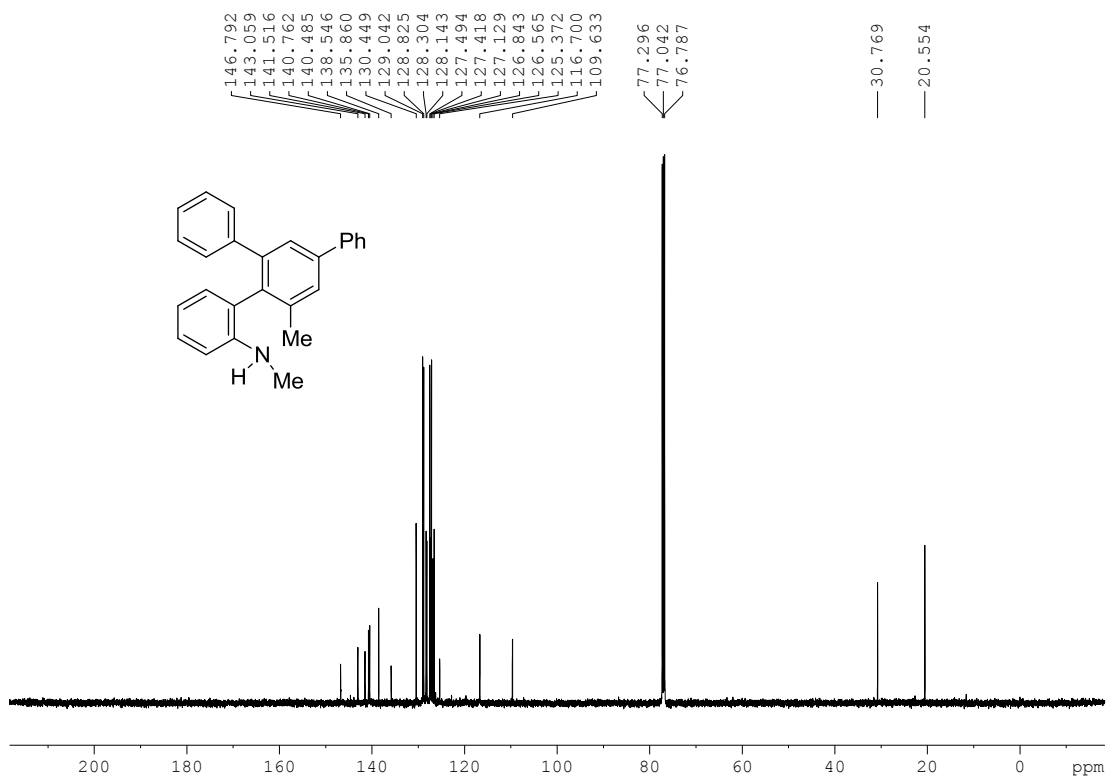

Figure S33. <sup>13</sup>C NMR spectrum of compound 18

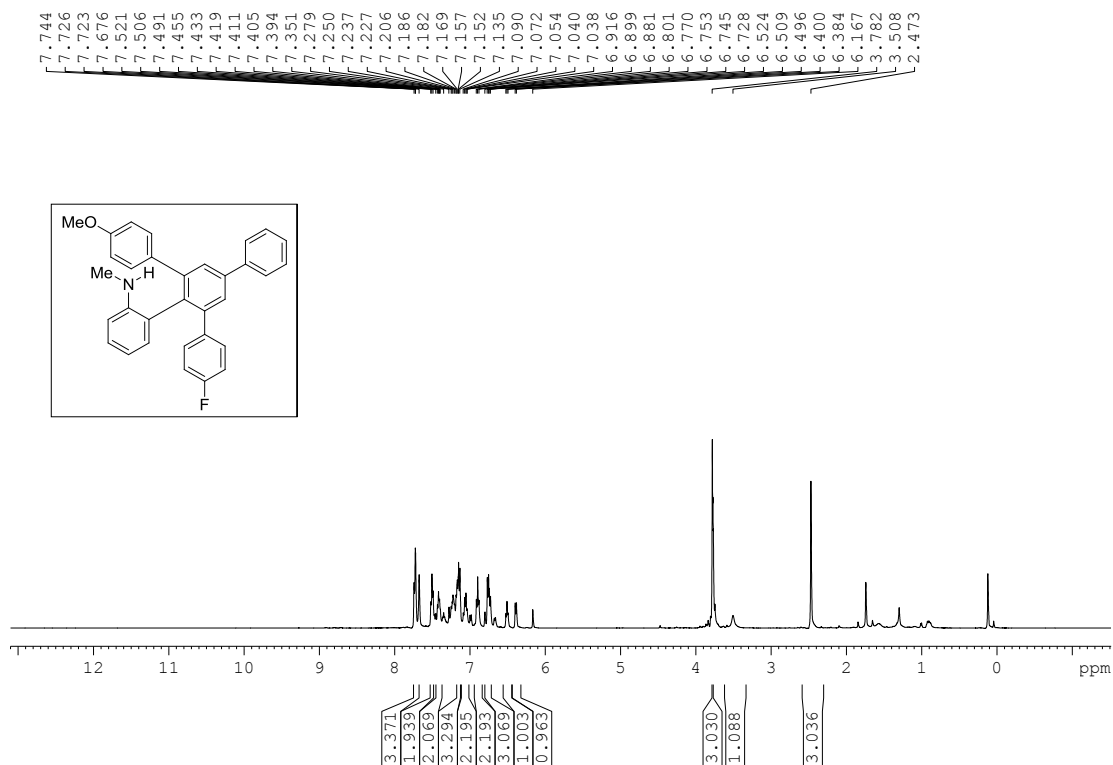

Figure S34. <sup>1</sup>H NMR spectrum of compound 19

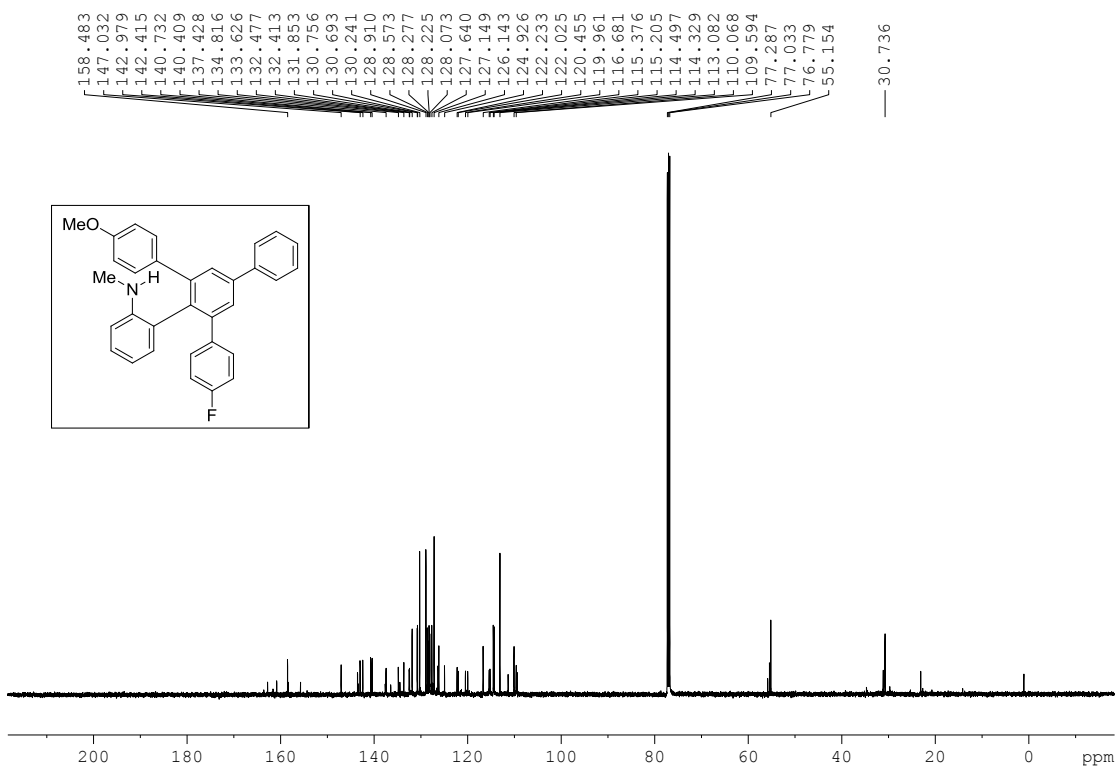

Figure S35. <sup>13</sup>C NMR spectrum of compound 19

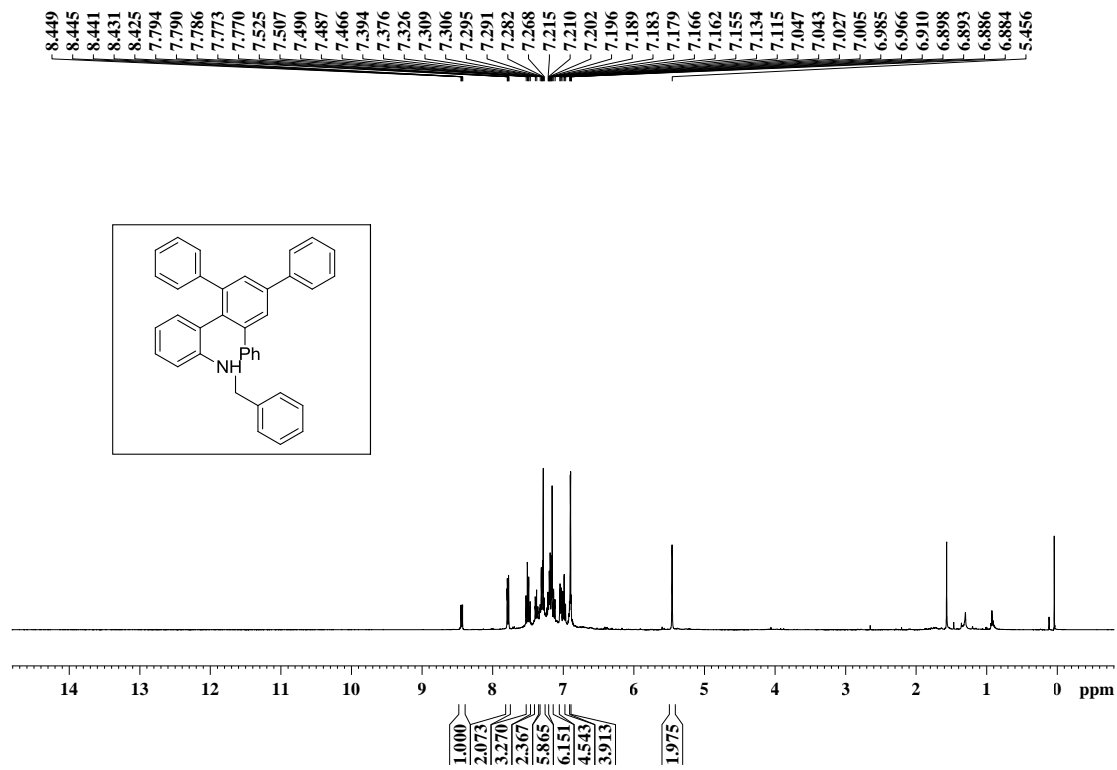

Figure S36. <sup>1</sup>H NMR spectrum of compound 20

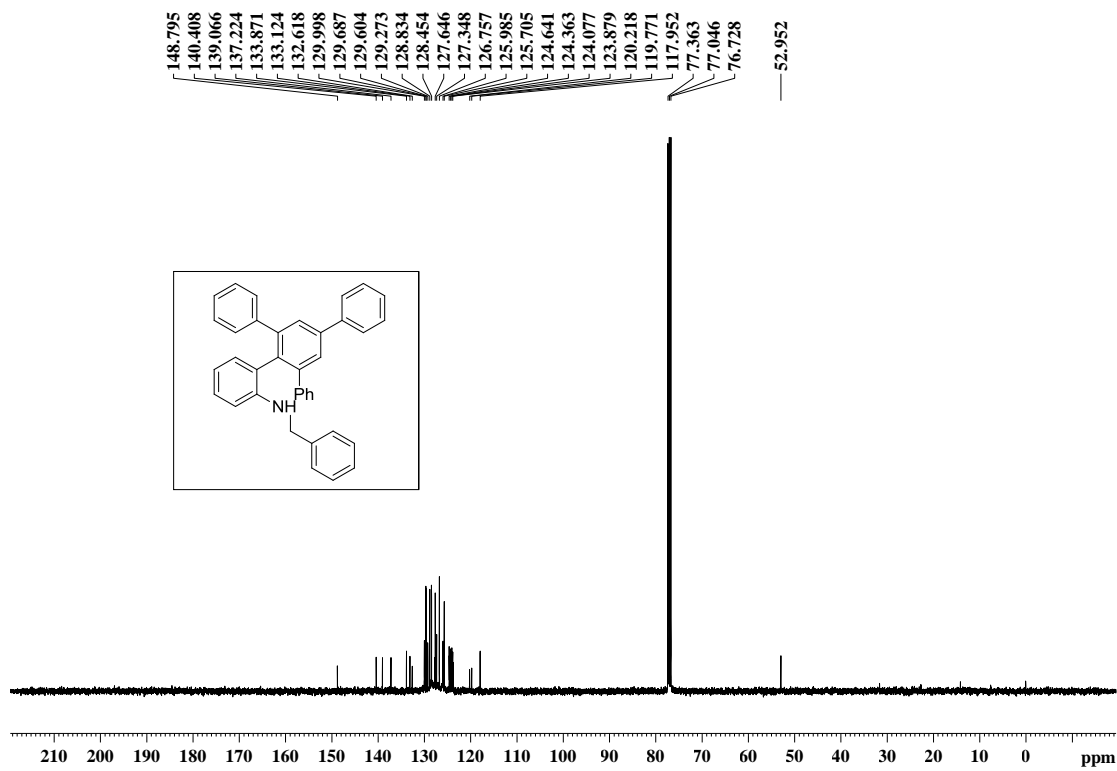

Figure S37. <sup>13</sup>C NMR spectrum of compound 20

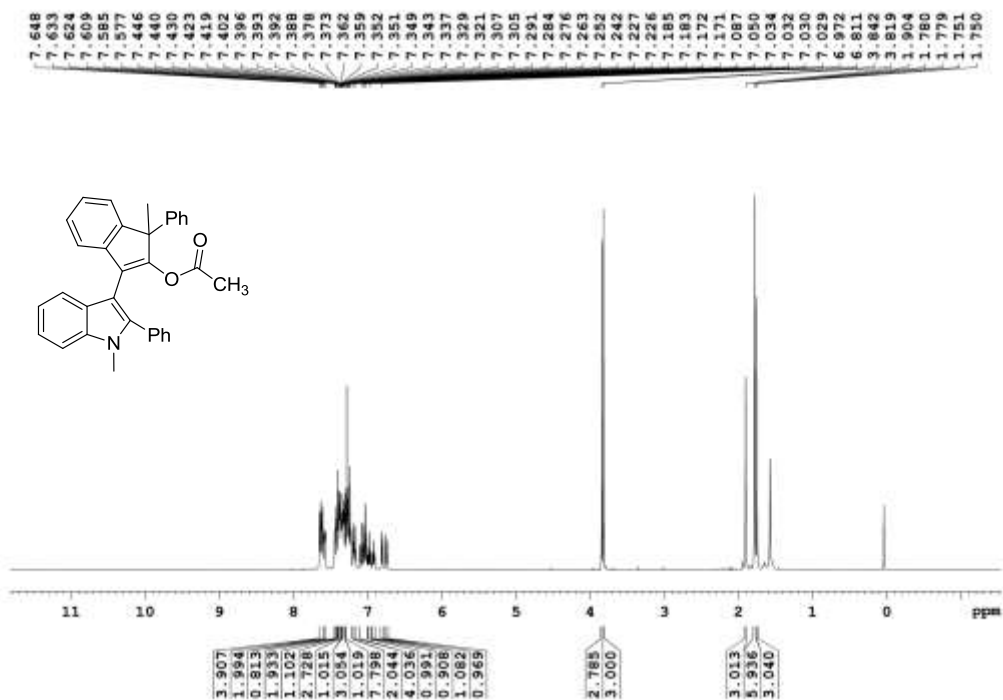

Figure S38.  $^1\text{H}$  NMR spectrum of compound 21

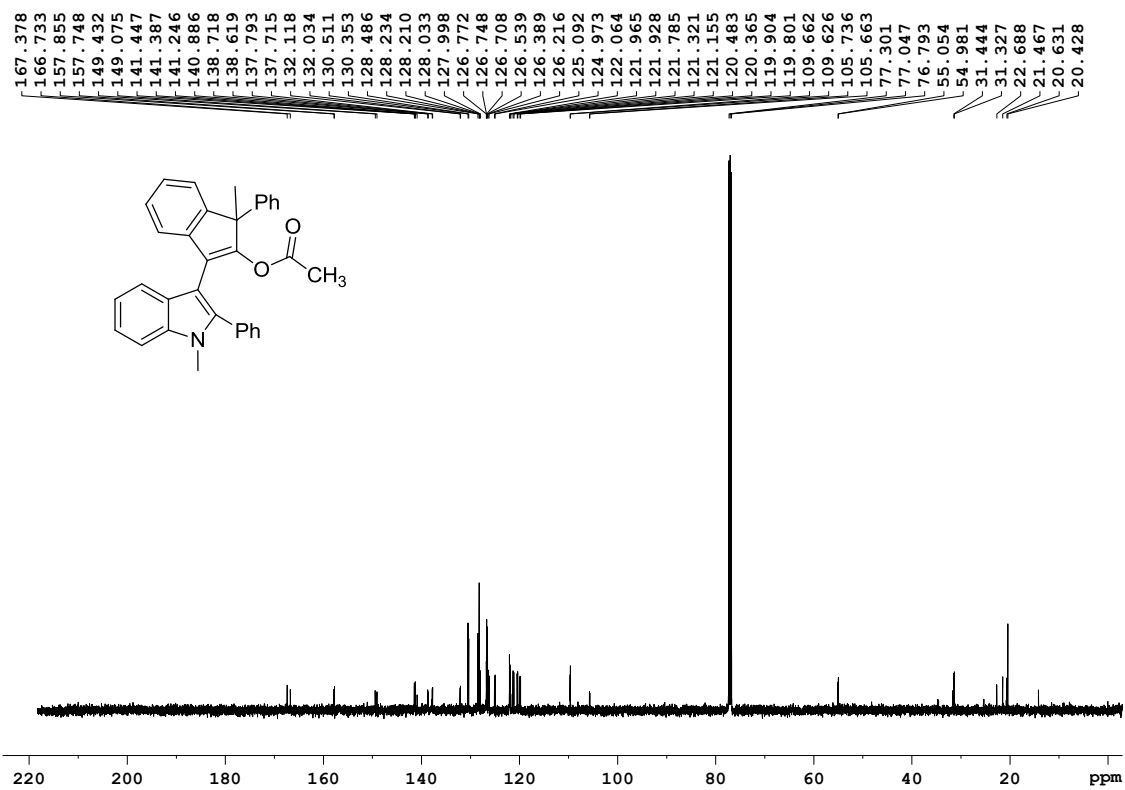

Figure S39.  $^{13}\text{C}$  NMR spectrum of compound 21

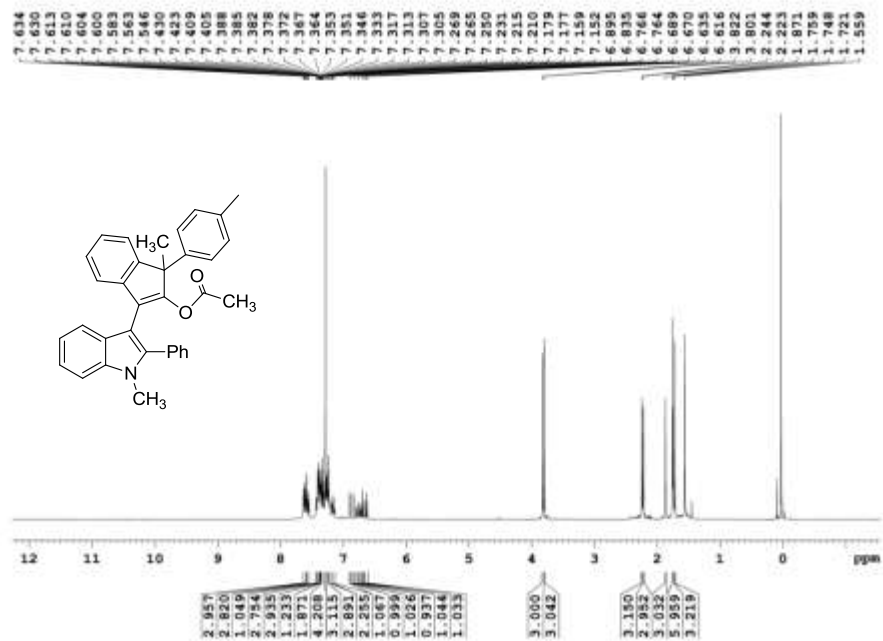

Figure S40. <sup>1</sup>H NMR spectrum of compound 22

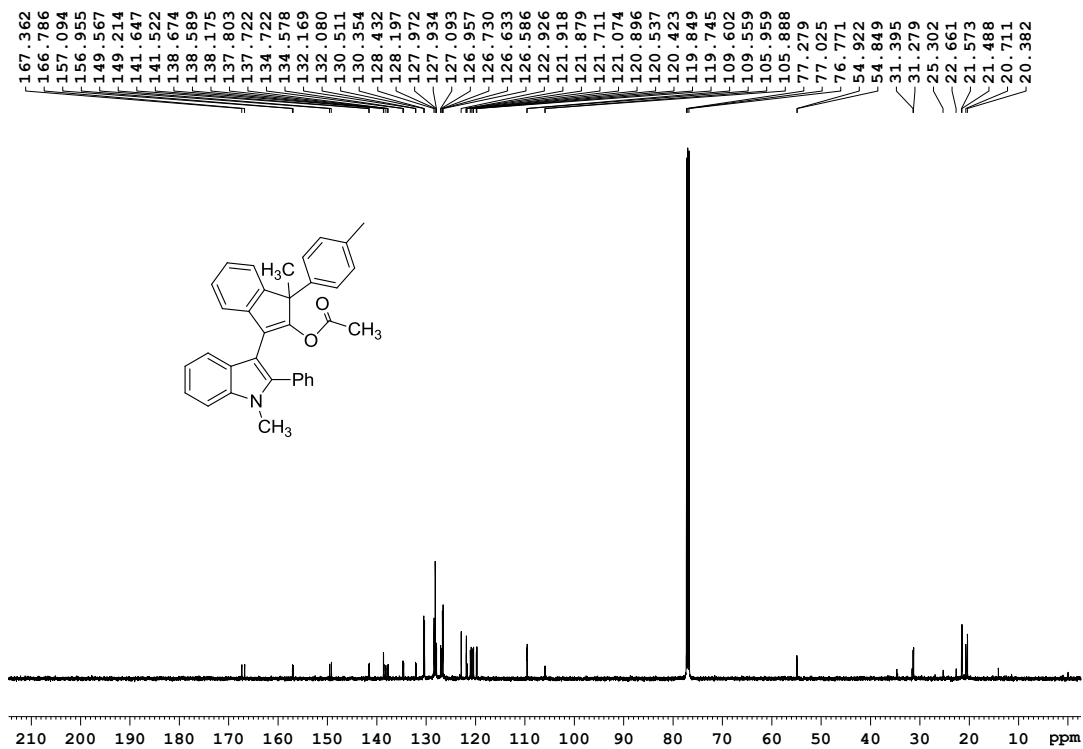

Figure S41. <sup>13</sup>C NMR spectrum of compound 22

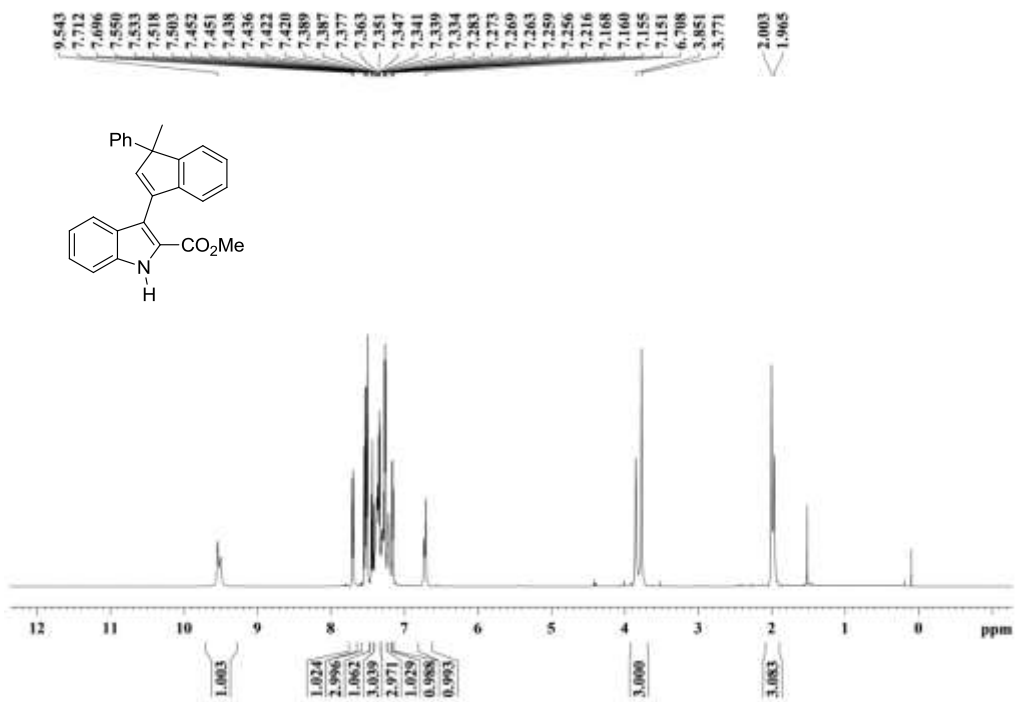

Figure S42. <sup>1</sup>H NMR spectrum of compound 23

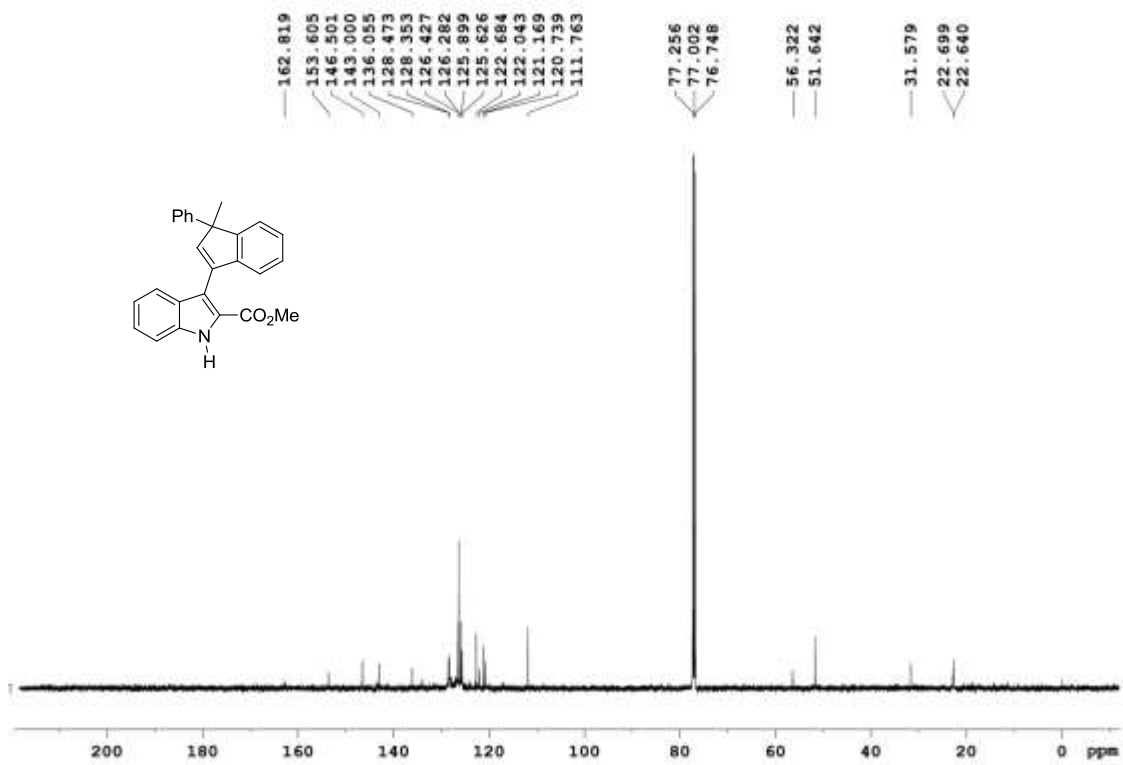

Figure S43. <sup>13</sup>C NMR spectrum of compound 23

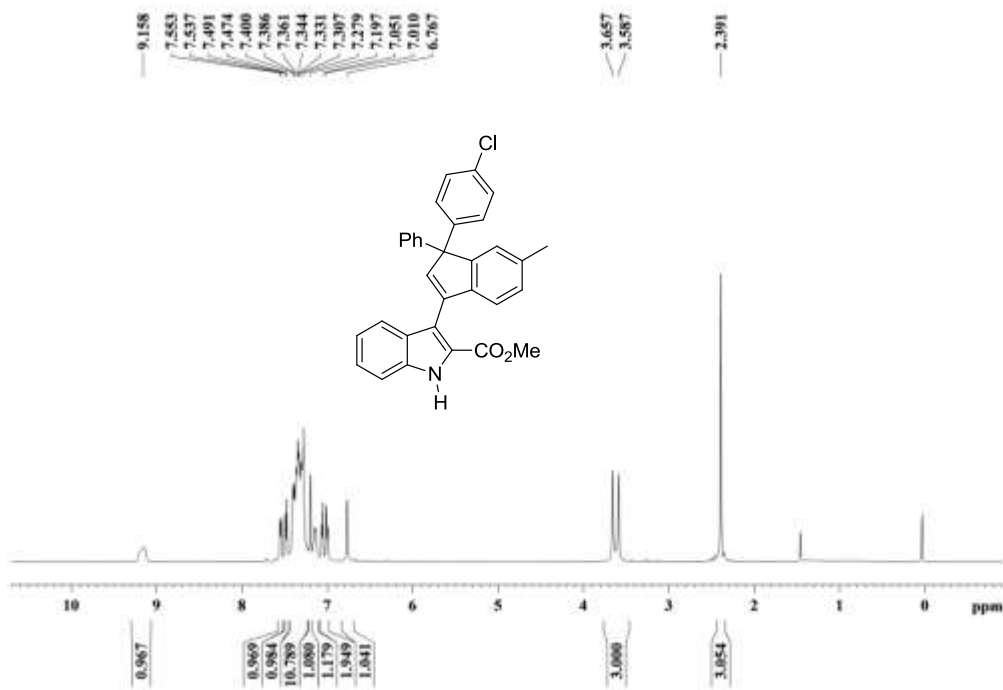

Figure S44. <sup>1</sup>H NMR spectrum of compound 24

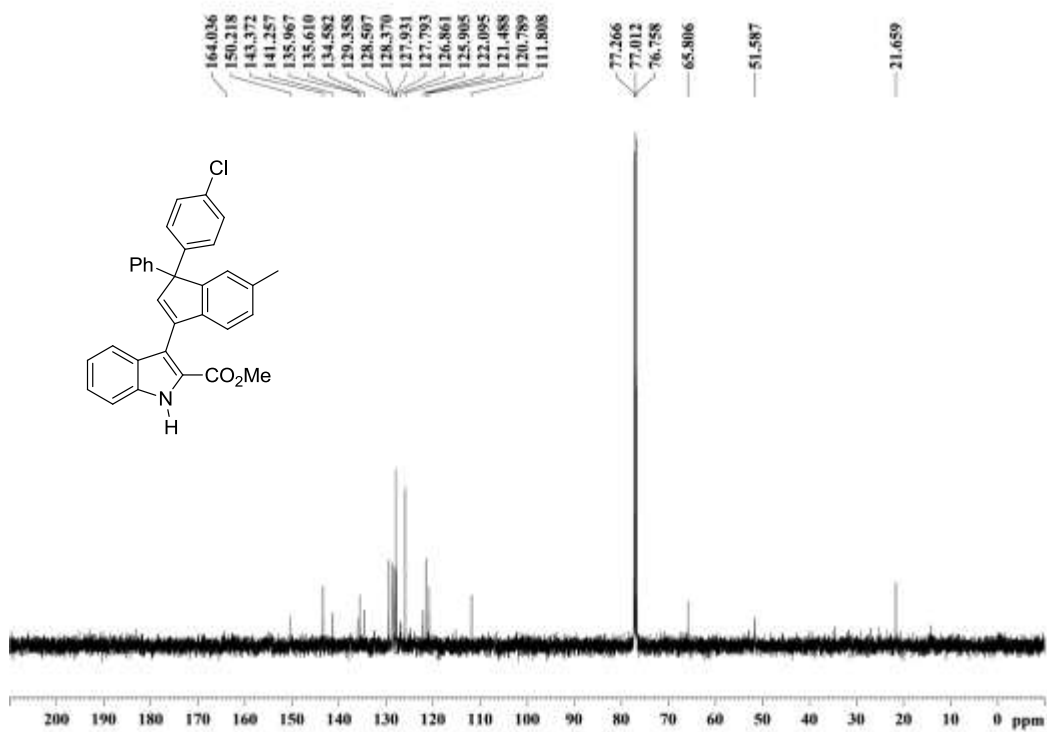

Figure S45. <sup>13</sup>C NMR spectrum of compound 24

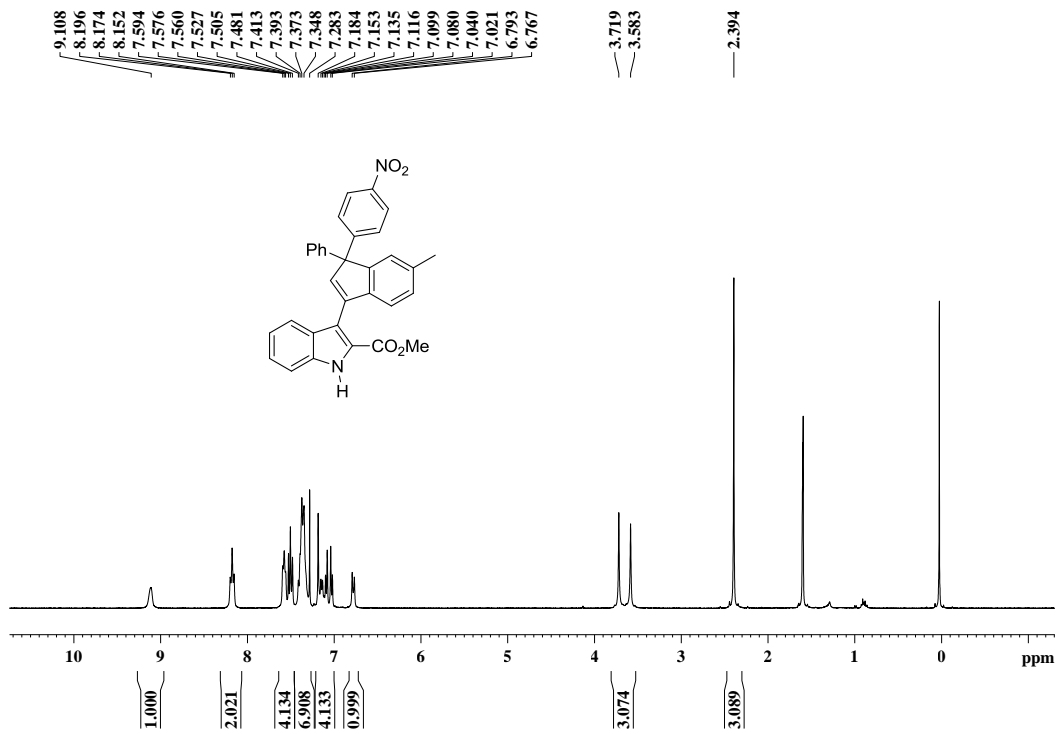

Figure S46. <sup>1</sup>H NMR spectrum of compound 25

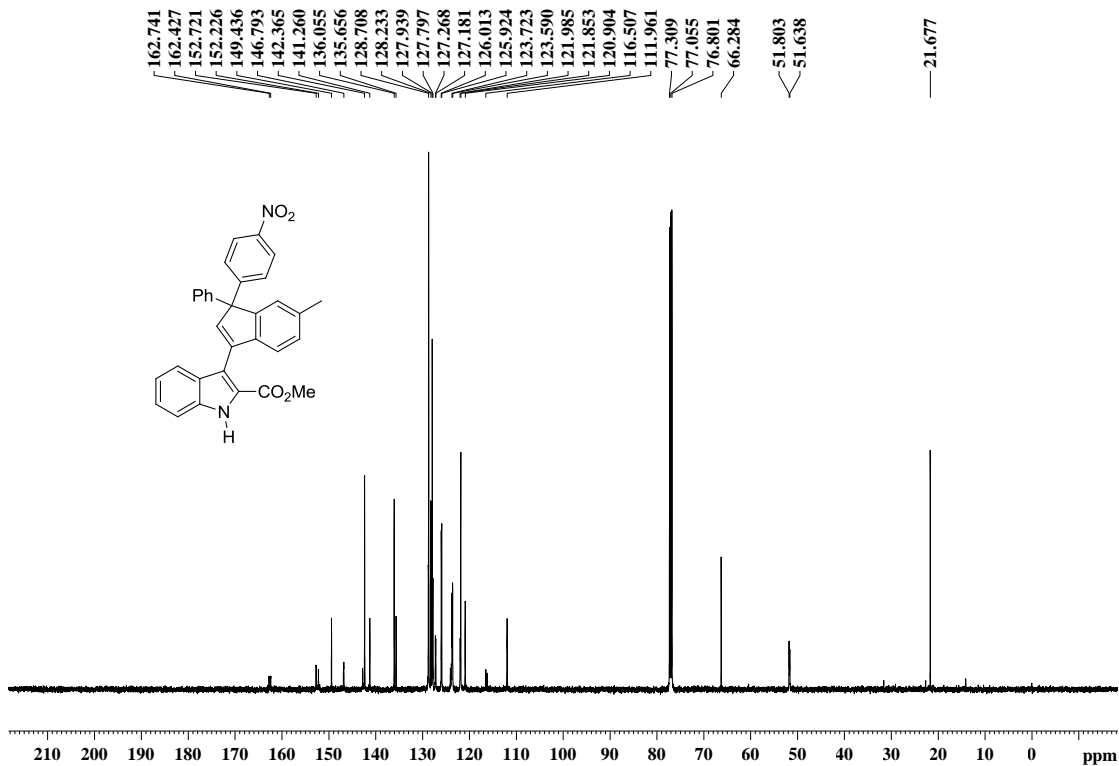

Figure S47. <sup>13</sup>C NMR spectrum of compound 25



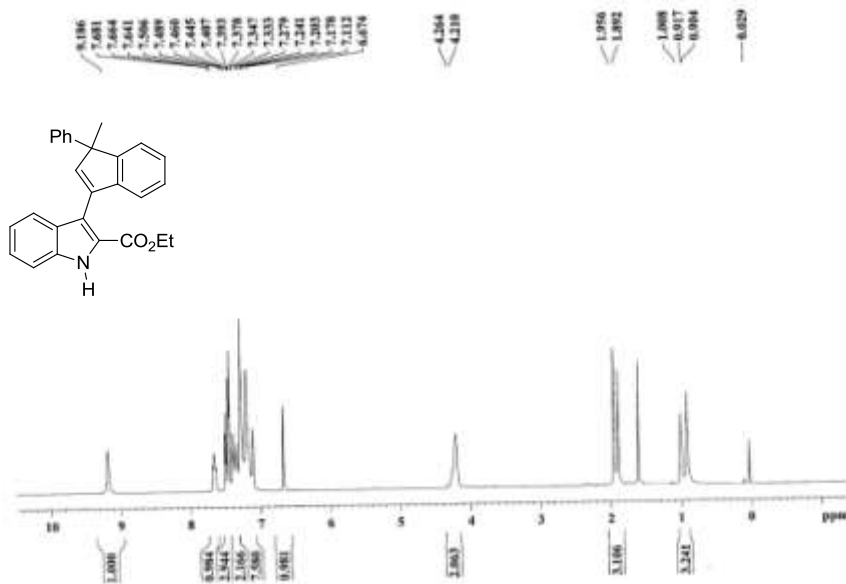

Figure S48. <sup>1</sup>H NMR spectrum of compound 26

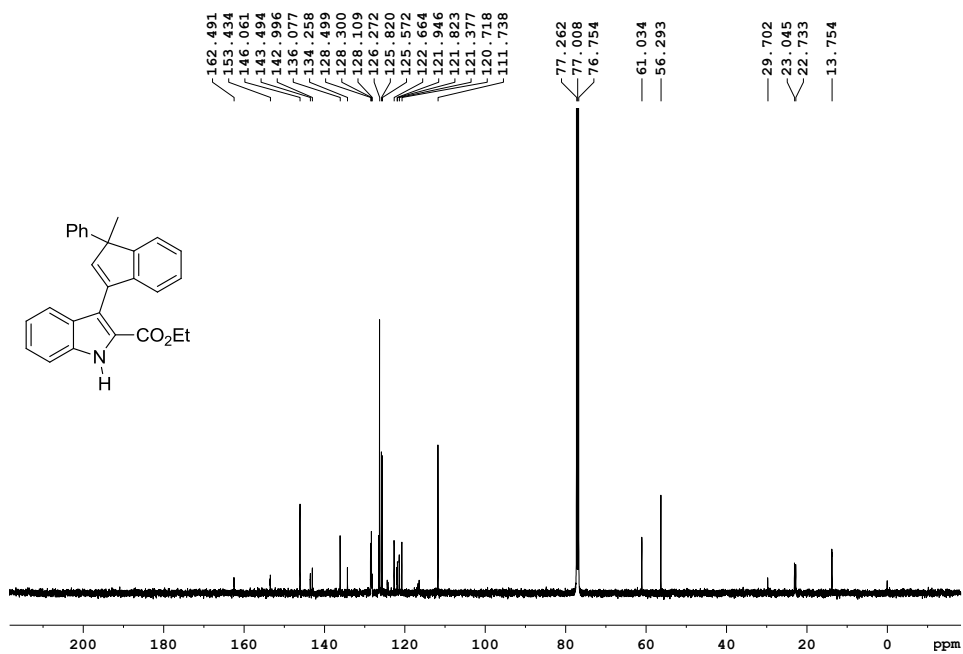

Figure S49. <sup>13</sup>C NMR spectrum of compound 26

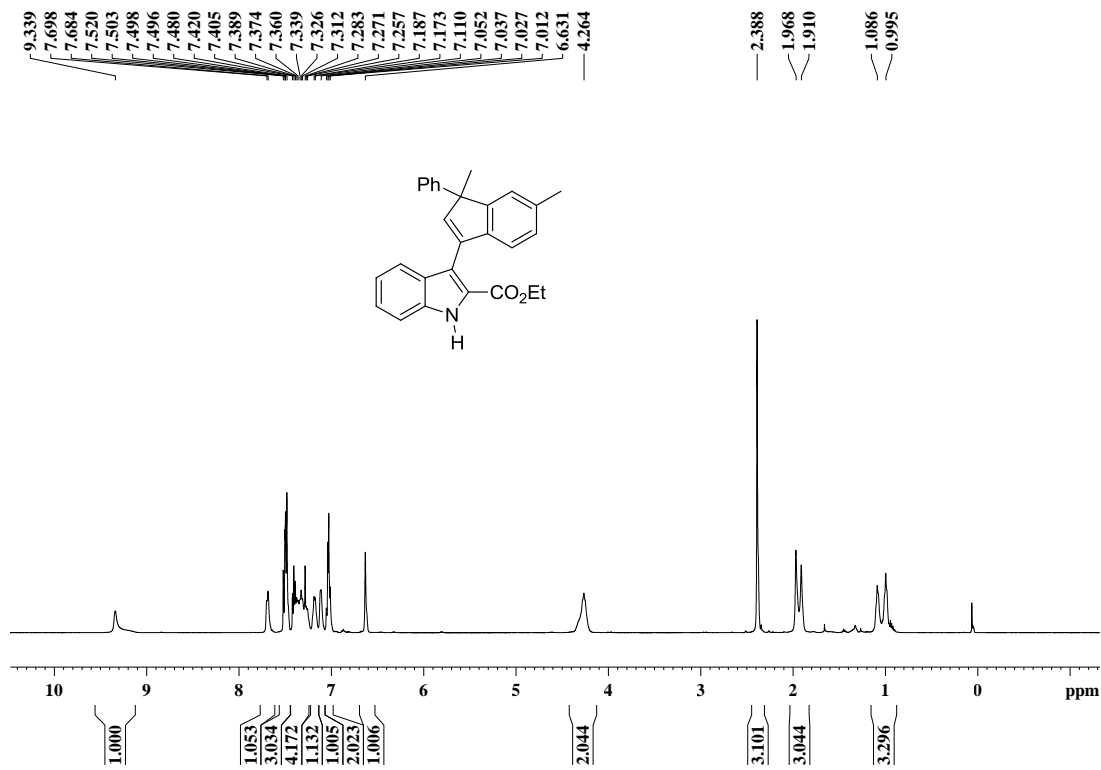

Figure S50. <sup>1</sup>H NMR spectrum of compound 27

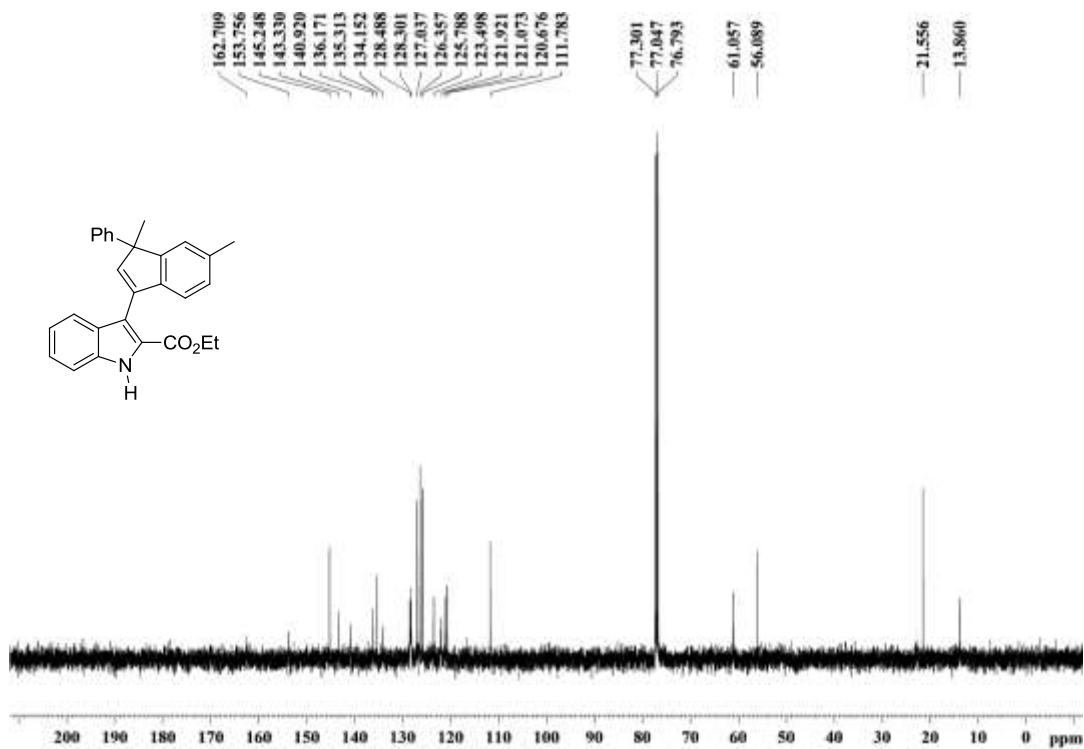

Figure S51. <sup>13</sup>C NMR spectrum of compound 27

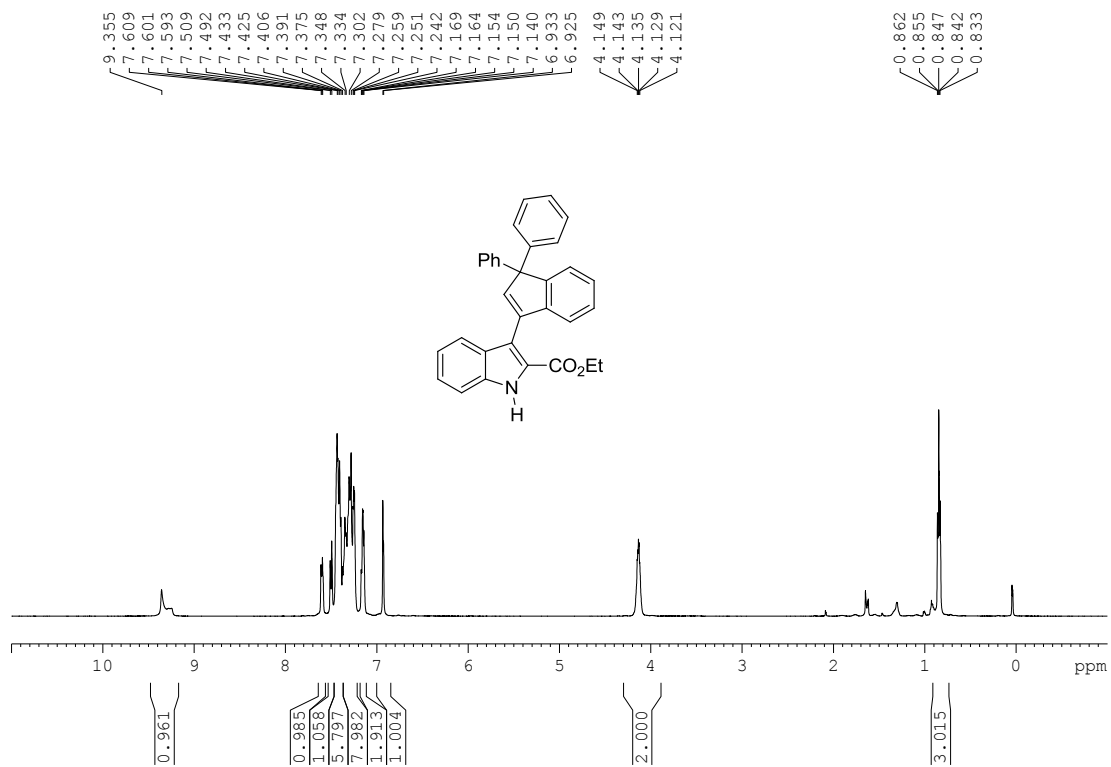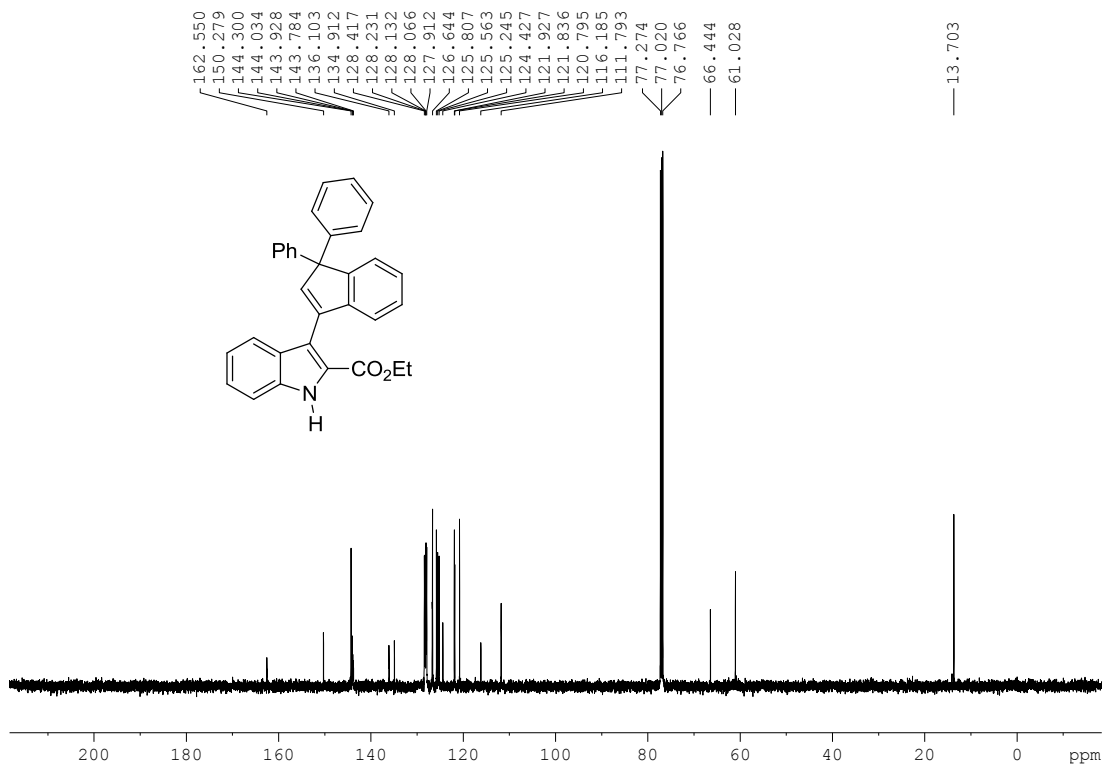

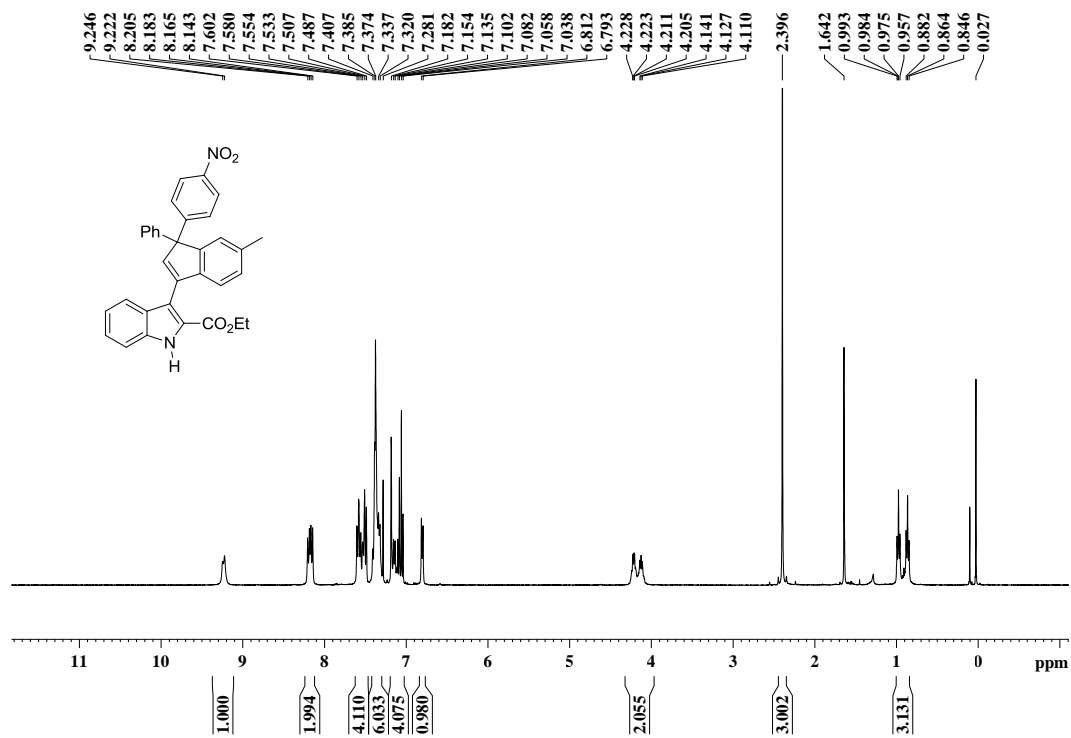

Figure S54. <sup>1</sup>H NMR spectrum of compound 29

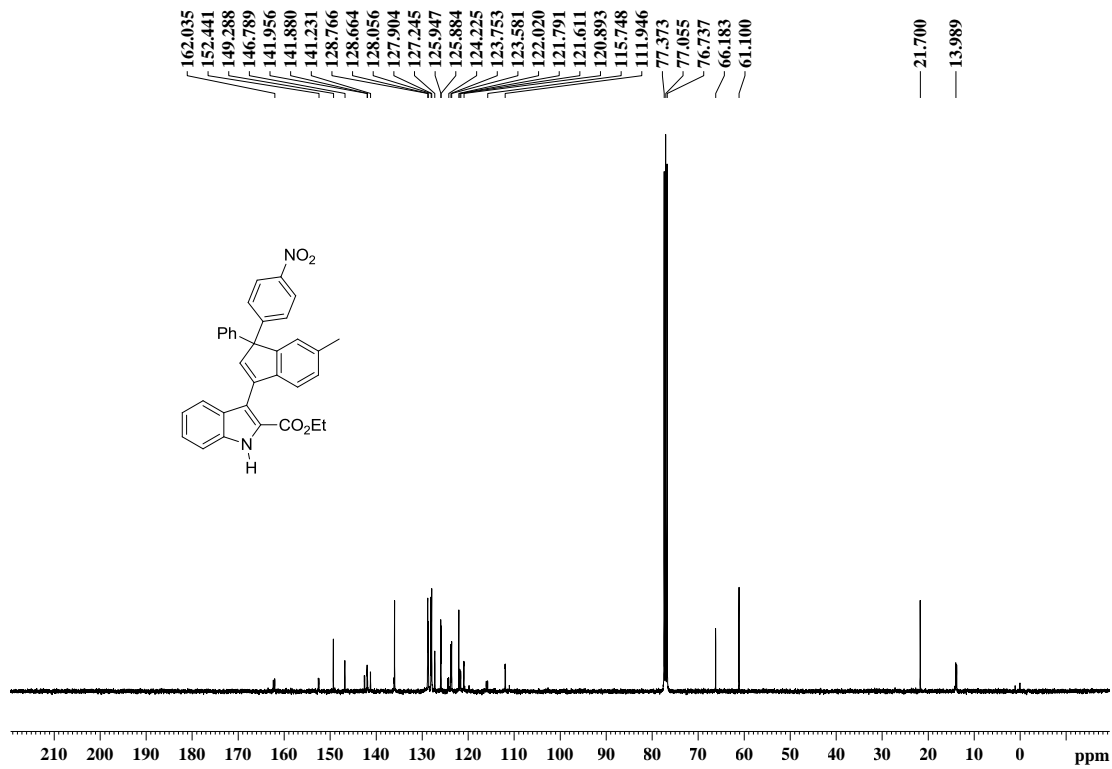

Figure S55. <sup>13</sup>C NMR spectrum of compound 29

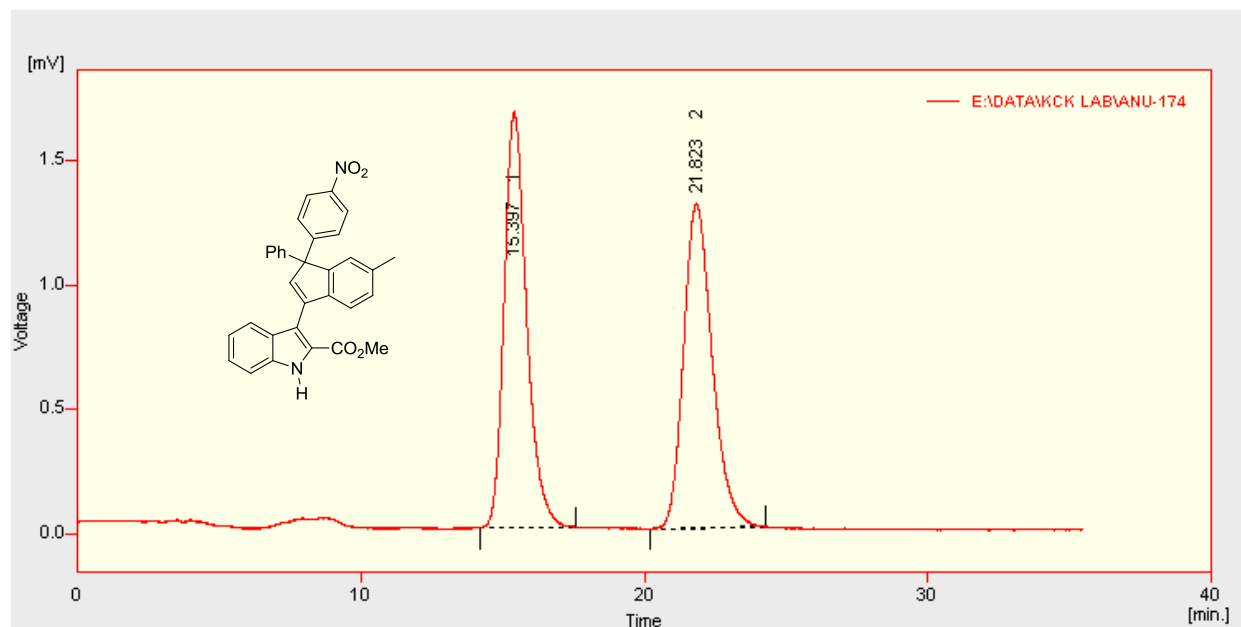

**Figure S56.** Chiral HPLC of compound **25**.

*Result Table (Uncal - E:\DATA\KCK LAB\ANU-174)*

|   | Reten. Time<br>[min] | Area<br>[mV.s] | Height<br>[mV] | Area<br>[%]  | Height<br>[%] | W05<br>[min] |
|---|----------------------|----------------|----------------|--------------|---------------|--------------|
| 1 | 15.397               | 92.160         | 1.672          | 50.0         | 56.2          | 0.83         |
| 2 | 21.823               | 92.109         | 1.304          | 50.0         | 43.8          | 1.08         |
|   | <b>Total</b>         | <b>184.269</b> | <b>2.976</b>   | <b>100.0</b> | <b>100.0</b>  |              |

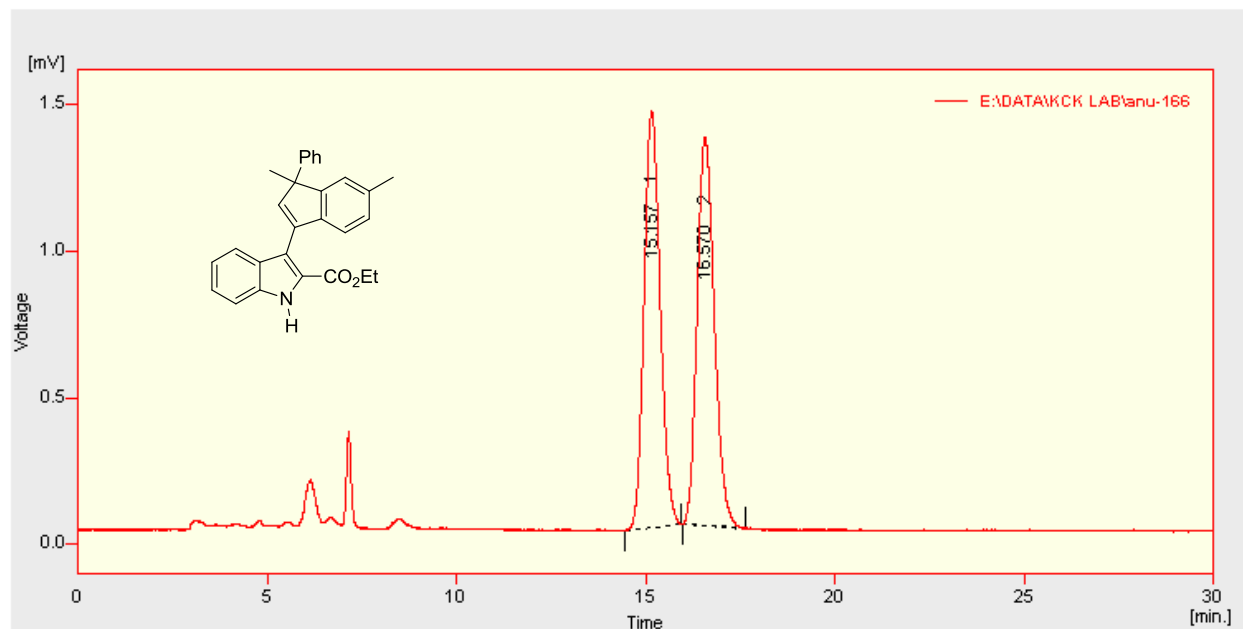

**Figure S57.**Chiral HPLC of compound **27**.

*Result Table (Uncal - E:\DATA\KCK LAB\anu-166)*

|   | Reten. Time<br>[min] | Area<br>[mV.s] | Height<br>[mV] | Area<br>[%] | Height<br>[%] | W05<br>[min] |
|---|----------------------|----------------|----------------|-------------|---------------|--------------|
| 1 | 15.157               | 41.989         | 1.418          | 50.1        | 51.7          | 0.46         |
| 2 | 16.570               | 41.901         | 1.324          | 49.9        | 48.3          | 0.49         |
|   | Total                | 83.890         | 2.742          | 100.0       | 100.0         |              |
